# Supplementary material for: The alkoxy radical polymerization of N-vinylpyrrolidone in organic solvents: theoretical insight into the mechanism and kinetics
Source: Royal Society of Chemistry journal article supplement (doi:10.1039/d3ra03820c), 2023-01-01
Supplement: d3ra03820c1.pdf [file d3ra03820c1.pdf]

## Supporting Information (SI)

---

### The alkoxy radical polymerization of N-vinylpyrrolidone in organic solvents: Theoretical insight into the mechanism and kinetics

Quan V. Vo<sup>1\*</sup>, Truong Le Bich Tram,<sup>2\*</sup> Hoang Phuoc Loc<sup>3\*</sup>, Nguyen Thi Hoa<sup>2</sup> and Adam Mechler<sup>4</sup>

<sup>1</sup>*The University of Danang - University of Technology and Education, Danang 550000, Vietnam.*

<sup>2</sup>*Department of Science-Technology and Environment, The University of Danang, Danang 550000, Vietnam*

<sup>3</sup>*Quang Tri Teacher Training College, Dong Ha, Quang Tri, 520000, Viet Nam*

<sup>4</sup>*Department of Biochemistry and Chemistry, La Trobe University, Victoria 3086, Australia.*

*\*Corresponding authors: [vvquan@ute.udn.vn](mailto:vvquan@ute.udn.vn); [tlbtram@ac.udn.vn](mailto:tlbtram@ac.udn.vn); [loc\\_hp@qtttc.edu.vn](mailto:loc_hp@qtttc.edu.vn)*

### Table of Contents

|                                                                                                                                                                                                                                                       |    |
|-------------------------------------------------------------------------------------------------------------------------------------------------------------------------------------------------------------------------------------------------------|----|
| Figure S1: The IRC plots for the selected transition states in IP and TL (NVP: N-vinylpyrrolidone; FHT: formal hydrogen transfer and RAF: radical adduct formation: IP: isopropanol; TL: toluene). .....                                              | S2 |
| Figure S2: Atom in molecule topological shapes of the selected TSs. Small red and yellow spheres indicate bond critical points (BCPs) and ring critical points (RCPs), respectively. ....                                                             | S3 |
| Table S1: Selected parameters at the BCPs and bond critical points (BCPs) and ring critical points (RCPs), for the transition states at 298.15 K.....                                                                                                 | S4 |
| Table S2: The Cartesian coordinates and energies of transition states following the RAF and FHT mechanisms in IP and TL (NVP: N-vinylpyrrolidone; FHT: formal hydrogen transfer and RAF: radical adduct formation: IP: isopropanol; TL: toluene)..... | S7 |

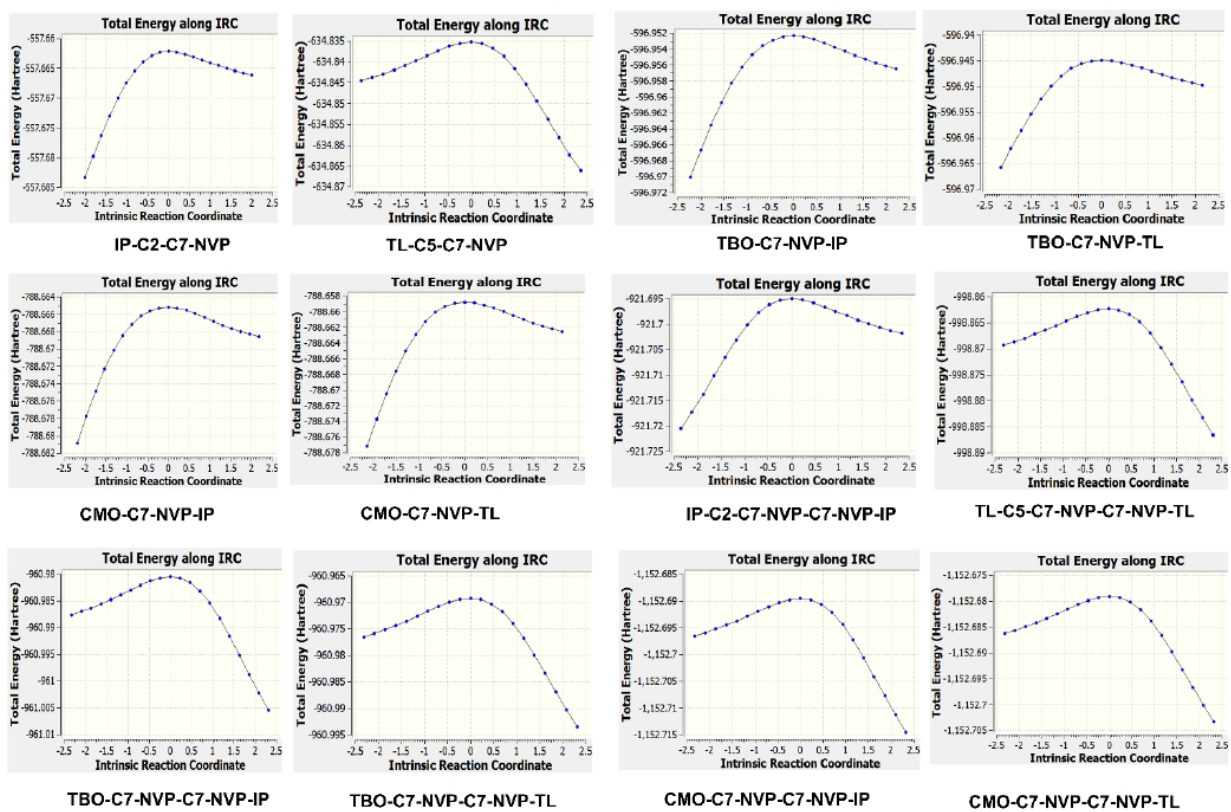

Figure S1: The IRC plots for the selected transition states in IP and TL (NVP: N-vinylpyrrolidone; FHT: formal hydrogen transfer and RAF: radical adduct formation: IP: isopropanol; TL: toluene).

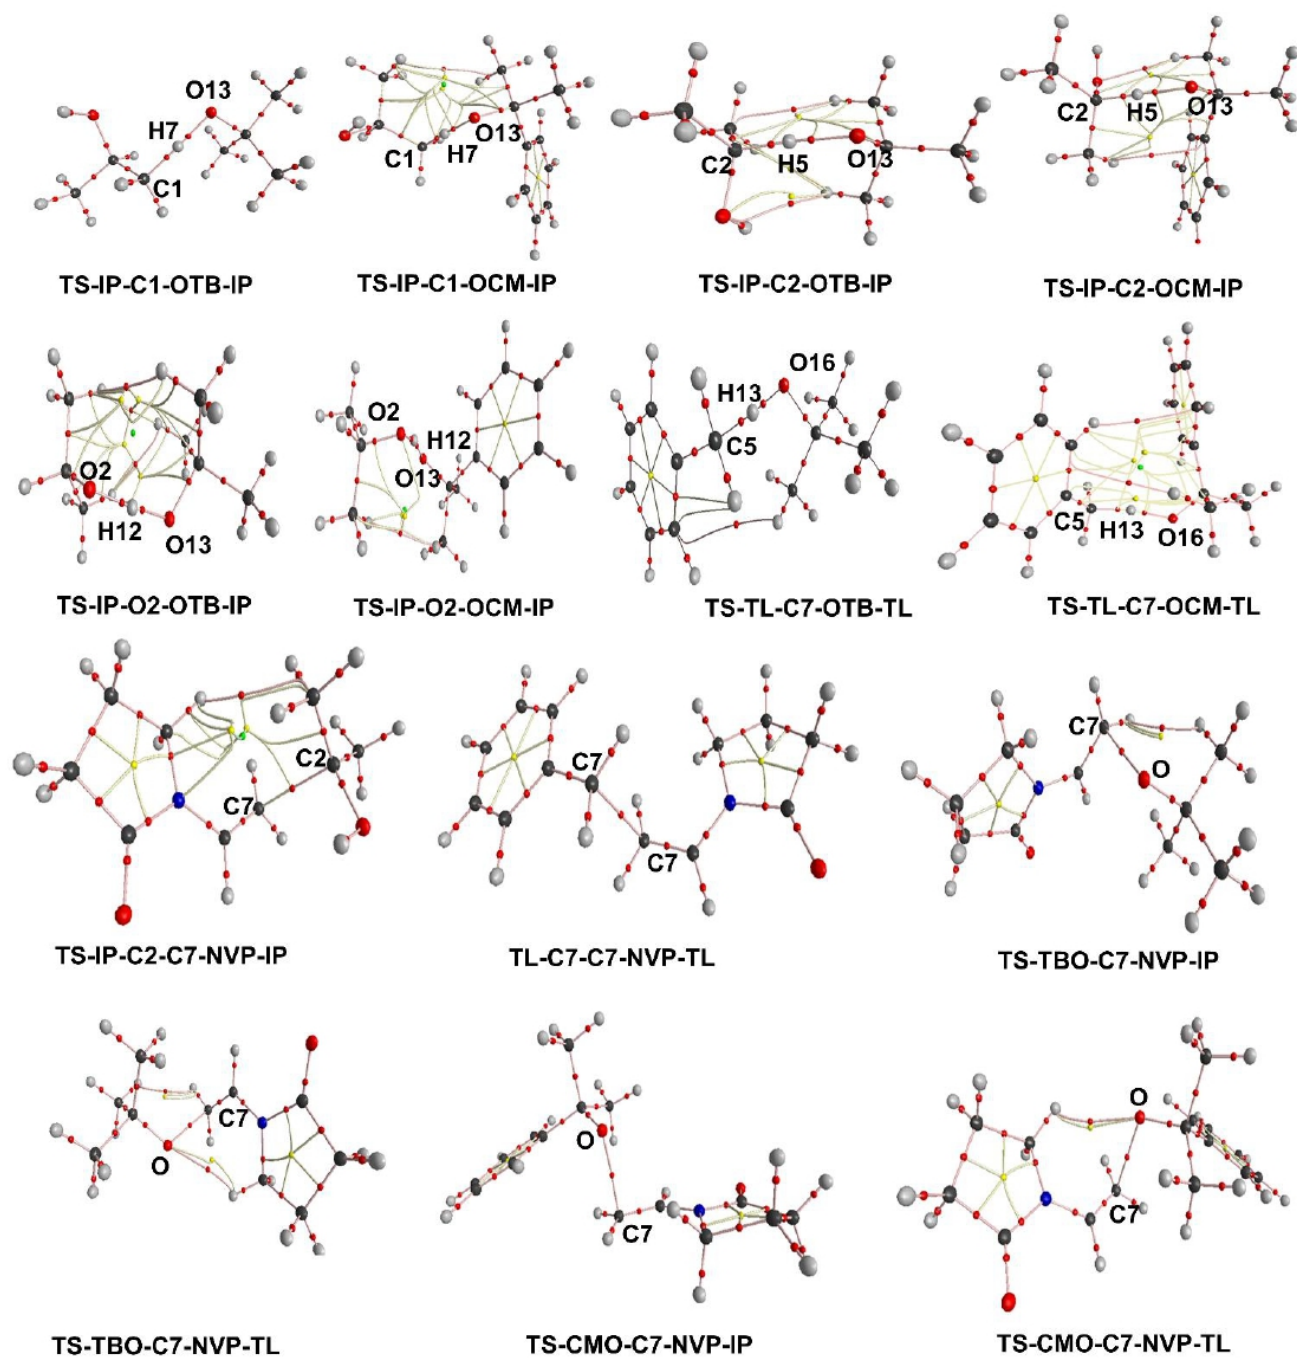

Figure S2: Atom in molecule topological shapes of the selected TSs. Small red and yellow spheres indicate bond critical points (BCPs) and ring critical points (RCPs), respectively.

**Table S1: Selected parameters at the BCPs and bond critical points (BCPs) and ring critical points (RCPs), for the transition states at 298.15 K**

| Contacts              | $\rho(r)$ (au) | $\nabla^2\rho(r)$ (au) | $G(r)^a$ (au) | $V(r)^b$ (au) | $G(r)/ V(r) $ | $H(r)^c$ (au) | $E_{HB}^d$<br>(kcal/.mol) |
|-----------------------|----------------|------------------------|---------------|---------------|---------------|---------------|---------------------------|
| <b>IP-C1-H-OTB-IP</b> |                |                        |               |               |               |               |                           |
| C1...H7               | 0.1801         | -0.3716                | 0.0393        | -0.1715       | 0.2291        | -0.1322       | -53.8                     |
| O13...H7              | 0.1405         | 0.0366                 | 0.0883        | -0.1675       | 0.5273        | -0.0792       | -52.5                     |
| <b>IP-C1-H-OCM-IP</b> |                |                        |               |               |               |               |                           |
| C1...H7               | 0.1812         | -0.3782                | 0.0393        | -0.1731       | 0.2269        | -0.1339       | -54.3                     |
| O13...H7              | 0.1368         | 0.0478                 | 0.0866        | -0.1613       | 0.5371        | -0.0747       | -50.6                     |
| (CMO)C6...H1          | 0.0043         | 0.0145                 | 0.0029        | -0.0021       | 1.3465        | 0.0007        | -0.7                      |
| RCP1                  | 0.0038         | 0.0142                 | 0.0029        | -0.0022       | 1.3206        | 0.0007        | -0.7                      |
| RCP2                  | 0.0038         | 0.0138                 | 0.0028        | -0.0021       | 1.3201        | 0.0007        | -0.7                      |
| <b>IP-C2-H-OTB-IP</b> |                |                        |               |               |               |               |                           |
| C2...H5               | 0.2218         | -0.5999                | 0.0354        | -0.2208       | 0.1603        | -0.1854       | -69.3                     |
| O13...H5              | 0.0938         | 0.1389                 | 0.0675        | -0.1002       | 0.6733        | -0.0327       | -31.4                     |
| (TBO)H3...O2          | 0.0058         | 0.0211                 | 0.0045        | -0.0036       | 1.2276        | 0.0008        | -1.1                      |
| (TBO)H3...H1          | 0.0058         | 0.0175                 | 0.0037        | -0.0031       | 1.2102        | 0.0006        | -1.0                      |
| (TBO)H1...C1          | 0.0053         | 0.0177                 | 0.0036        | -0.0028       | 1.2858        | 0.0008        | -0.9                      |
| RCP1                  | 0.0058         | 0.0220                 | 0.0046        | -0.0037       | 1.2362        | 0.0009        | -1.2                      |
| RCP2                  | 0.0055         | 0.0193                 | 0.0040        | -0.0032       | 1.2585        | 0.0008        | -1.0                      |
| RCP3                  | 0.0046         | 0.0170                 | 0.0035        | -0.0027       | 1.2853        | 0.0008        | -0.8                      |
| <b>IP-C2-H-OCM-IP</b> |                |                        |               |               |               |               |                           |
| C2...H5               | 0.2234         | -0.6099                | 0.0352        | -0.2229       | 0.1579        | -0.1877       | -69.9                     |
| O13...H5              | 0.0894         | 0.1399                 | 0.0643        | -0.0937       | 0.6867        | -0.0293       | -29.4                     |
| (CMO)H1...O2          | 0.0079         | 0.0245                 | 0.0055        | -0.0049       | 1.1245        | 0.0006        | -1.5                      |
| (CMO)C4...H1          | 0.0070         | 0.0215                 | 0.0045        | -0.0037       | 1.2249        | 0.0008        | -1.2                      |
| RCP1                  | 0.0059         | 0.0233                 | 0.0050        | -0.0041       | 1.2141        | 0.0009        | -1.3                      |
| RCP2                  | 0.0059         | 0.0208                 | 0.0043        | -0.0034       | 1.2617        | 0.0009        | -1.1                      |
| <b>IP-O2-H-OTB-IP</b> |                |                        |               |               |               |               |                           |
| O2...H12              | 0.1871         | -0.3096                | 0.1008        | -0.2790       | 0.3613        | -0.1782       | -87.5                     |
| O13...H12             | 0.1868         | -0.3073                | 0.1007        | -0.2782       | 0.3620        | -0.1775       | -87.3                     |
| (TBO)H1...H1          | 0.0044         | 0.0135                 | 0.0028        | -0.0022       | 1.2530        | 0.0006        | -0.7                      |
| (TBO)H3...H1          | 0.0072         | 0.0194                 | 0.0042        | -0.0036       | 1.1803        | 0.0006        | -1.1                      |

|                        |        |         |        |         |        |         |       |
|------------------------|--------|---------|--------|---------|--------|---------|-------|
| (TBO)H3...H3           | 0.0052 | 0.0154  | 0.0032 | -0.0027 | 1.2245 | 0.0006  | -0.8  |
| RCP1                   | 0.0037 | 0.0123  | 0.0025 | -0.0020 | 1.2836 | 0.0006  | -0.6  |
| RCP2                   | 0.0039 | 0.0133  | 0.0027 | -0.0021 | 1.2751 | 0.0006  | -0.7  |
| RCP3                   | 0.0046 | 0.0162  | 0.0034 | -0.0027 | 1.2627 | 0.0007  | -0.8  |
| RCP4                   | 0.0042 | 0.0148  | 0.0030 | -0.0023 | 1.2879 | 0.0007  | -0.7  |
| XANH                   | 0.0030 | 0.0117  | 0.0023 | -0.0017 | 1.3497 | 0.0006  | -0.5  |
| <b>IP-O2-H-OCM-IP</b>  |        |         |        |         |        |         |       |
| O2...H12               | 0.1917 | -0.3371 | 0.1018 | -0.2879 | 0.3536 | -0.1861 | -90.3 |
| O13...H12              | 0.1861 | -0.2844 | 0.1015 | -0.2741 | 0.3703 | -0.1726 | -86.0 |
| (CMO)C1...H1           | 0.0048 | 0.0162  | 0.0032 | -0.0024 | 1.3431 | 0.0008  | -0.8  |
| RCP1                   | 0.0043 | 0.0156  | 0.0032 | -0.0024 | 1.3013 | 0.0007  | -0.8  |
| RCP2                   | 0.0042 | 0.0157  | 0.0032 | -0.0024 | 1.3135 | 0.0008  | -0.8  |
| <b>TL-C5-H-OTB-TL</b>  |        |         |        |         |        |         |       |
| C5...H13               | 0.1921 | -0.4313 | 0.0384 | -0.1846 | 0.2079 | -0.1462 | -57.9 |
| O16...H13              | 0.1209 | 0.0861  | 0.0801 | -0.1386 | 0.5776 | -0.0585 | -43.5 |
| C2...H1                | 0.0048 | 0.0150  | 0.0031 | -0.0024 | 1.2734 | 0.0007  | -0.8  |
| <b>TL-C5-H-OCM-TL</b>  |        |         |        |         |        |         |       |
| C5...H13               | 0.1911 | -0.4355 | 0.0361 | -0.1811 | 0.1995 | -0.1450 | -56.8 |
| O16...H13              | 0.1109 | 0.1032  | 0.0745 | -0.1231 | 0.6047 | -0.0487 | -38.6 |
| H2...C2(CMO)           | 0.0058 | 0.0154  | 0.0033 | -0.0027 | 1.2205 | 0.0006  | -0.8  |
| HC2...H5(CMO)          | 0.0053 | 0.0139  | 0.0030 | -0.0025 | 1.2054 | 0.0005  | -0.8  |
| RCP1                   | 0.0033 | 0.0097  | 0.0020 | -0.0016 | 1.2549 | 0.0004  | -0.5  |
| RCP2                   | 0.0032 | 0.0102  | 0.0021 | -0.0017 | 1.2640 | 0.0004  | -0.5  |
| RCP3                   | 0.0044 | 0.0149  | 0.0031 | -0.0024 | 1.2682 | 0.0006  | -0.8  |
| <b>IP-C2-C7-NVP-IP</b> |        |         |        |         |        |         |       |
| C2...C7                | 0.0493 | 0.0498  | 0.0218 | -0.0311 | 0.7003 | -0.0093 | -9.8  |
| (IP)C1...H5            | 0.0064 | 0.0209  | 0.0043 | -0.0034 | 1.2719 | 0.0009  | -1.1  |
| RCP1                   | 0.0053 | 0.0202  | 0.0042 | -0.0034 | 1.2351 | 0.0008  | -1.1  |
| RCP2                   | 0.0049 | 0.0179  | 0.0037 | -0.0029 | 1.2617 | 0.0008  | -0.9  |
| <b>TL-C7-C7-NVP-TL</b> |        |         |        |         |        |         |       |
| C5...C7                | 0.0494 | 0.1291  | 0.0342 | -0.0362 | 0.9454 | -0.0020 | -11.4 |
| (TBO)H1...H7           | 0.0079 | 0.0263  | 0.0054 | -0.0043 | 1.2651 | 0.0011  | -1.4  |
| RCP                    | 0.0076 | 0.0300  | 0.0061 | -0.0048 | 1.2848 | 0.0014  | -1.5  |
| <b>TBO-C7-NVP-IP</b>   |        |         |        |         |        |         |       |
| O...C7                 | 0.0473 | 0.1246  | 0.0327 | -0.0343 | 0.9545 | -0.0016 | -10.7 |
| <b>TBO-C7-NVP-TL</b>   |        |         |        |         |        |         |       |

|                                                                                                                                                           |        |        |        |         |        |         |       |
|-----------------------------------------------------------------------------------------------------------------------------------------------------------|--------|--------|--------|---------|--------|---------|-------|
| O...C7                                                                                                                                                    | 0.0550 | 0.1397 | 0.0383 | -0.0416 | 0.9193 | -0.0034 | -13.1 |
| (TBO)H1...H7                                                                                                                                              | 0.0077 | 0.0256 | 0.0053 | -0.0042 | 1.2659 | 0.0011  | -1.3  |
| O...H5                                                                                                                                                    | 0.0079 | 0.0281 | 0.0062 | -0.0053 | 1.1637 | 0.0009  | -1.7  |
| RCP1                                                                                                                                                      | 0.0075 | 0.0289 | 0.0059 | -0.0046 | 1.2869 | 0.0013  | -1.4  |
| RCP2                                                                                                                                                      | 0.0076 | 0.0305 | 0.0065 | -0.0054 | 1.2039 | 0.0011  | -1.7  |
| <b>CMO-C7-NVP-IP</b>                                                                                                                                      |        |        |        |         |        |         |       |
| O...C7                                                                                                                                                    | 0.0473 | 0.1246 | 0.0327 | -0.0343 | 0.9545 | -0.0016 | -10.7 |
| <b>CMO-C7-NVP-TL</b>                                                                                                                                      |        |        |        |         |        |         |       |
| O...C7                                                                                                                                                    | 0.0522 | 0.1343 | 0.0362 | -0.0389 | 0.9312 | -0.0027 | -12.2 |
| O...H5                                                                                                                                                    | 0.0070 | 0.0259 | 0.0056 | -0.0048 | 1.1756 | 0.0008  | -1.5  |
| RCP                                                                                                                                                       | 0.0070 | 0.0268 | 0.0058 | -0.0049 | 1.1895 | 0.0009  | -1.5  |
| a) electron kinetic energy density; b) electron potential energy density; c) total electron energy density; d) individual energies of each hydrogen bond. |        |        |        |         |        |         |       |

**Table S2: The Cartesian coordinates and energies of transition states following the RAF and FHT mechanisms in IP and TL (NVP: N-vinylpyrrolidone; FHT: formal hydrogen transfer and RAF: radical adduct formation: IP: isopropanol; TL: toluene).**

| Name                  |             |             |             | IP-C1-H-OTB-FHT-IP                           |                             |
|-----------------------|-------------|-------------|-------------|----------------------------------------------|-----------------------------|
| Cartesian Coordinates |             |             |             | Frequency and Energy                         |                             |
| O                     | 1.78846600  | -0.01712300 | 0.07461100  | Zero-point correction=                       | 0.227462 (Hartree/Particle) |
| C                     | 0.36148200  | -0.01131600 | 0.04733000  | Thermal correction to Energy=                | 0.239972                    |
| C                     | -0.18632100 | 1.22707600  | 0.71442900  | Thermal correction to Enthalpy=              | 0.240916                    |
| C                     | -0.15569500 | -0.13747900 | -1.38238100 | Thermal correction to Gibbs Free Energy=     | 0.188553                    |
| H                     | 0.06574800  | -0.89511300 | 0.61875200  | Sum of electronic and zero-point Energies=   | -427.054162                 |
| H                     | -1.27205900 | 1.23306000  | 0.81366500  | Sum of electronic and thermal Energies=      | -427.041652                 |
| H                     | 0.27066900  | 1.24283700  | 1.86549500  | Sum of electronic and thermal Enthalpies=    | -427.040708                 |
| H                     | 0.18781500  | 2.15799700  | 0.27928900  | Sum of electronic and thermal Free Energies= | -427.093071                 |
| H                     | -1.24585000 | -0.20485100 | -1.39488900 |                                              |                             |
| H                     | 0.25598000  | -1.03512100 | -1.84971300 |                                              |                             |
| H                     | 0.14425800  | 0.73489800  | -1.97113800 |                                              |                             |
| H                     | 2.10242000  | 0.74460000  | -0.42827400 |                                              |                             |
| O                     | 0.77786100  | 1.18423400  | 3.05034700  |                                              |                             |
| C                     | -0.26678100 | 0.87550900  | 3.95878300  |                                              |                             |
| C                     | -1.29792600 | 2.00101800  | 3.99531200  |                                              |                             |
| C                     | 0.45276600  | 0.76900600  | 5.31048000  |                                              |                             |
| C                     | -0.91583800 | -0.45967800 | 3.60048700  |                                              |                             |
| H                     | -1.78646700 | 2.10360100  | 3.02243900  |                                              |                             |
| H                     | -0.81453700 | 2.94916000  | 4.24395600  |                                              |                             |
| H                     | -2.06668500 | 1.79406400  | 4.74427000  |                                              |                             |
| H                     | 0.94934300  | 1.71066700  | 5.55470800  |                                              |                             |
| H                     | -0.27884600 | 0.54497500  | 6.09089500  |                                              |                             |
| H                     | 1.19726000  | -0.02968800 | 5.28560400  |                                              |                             |
| H                     | -1.44042600 | -0.38837600 | 2.64366700  |                                              |                             |
| H                     | -1.64138200 | -0.74867500 | 4.36520900  |                                              |                             |
| H                     | -0.15607200 | -1.24197200 | 3.52657200  |                                              |                             |
| Name                  |             |             |             | IP-C2-H-OTB-FHT-IP                           |                             |
| Cartesian Coordinates |             |             |             | Frequency and Energy                         |                             |
| O                     | 0.80417800  | 1.63541300  | -0.06721700 | Zero-point correction=                       | 0.228662 (Hartree/Particle) |
| C                     | 0.60167000  | 0.24914300  | -0.19303800 | Thermal correction to Energy=                | 0.241077                    |
| C                     | -0.42990600 | -0.28411300 | 0.77911800  | Thermal correction to Enthalpy=              | 0.242022                    |
| C                     | 0.31895500  | -0.06324800 | -1.64304200 | Thermal correction to Gibbs Free Energy=     | 0.190625                    |
| H                     | 1.63241900  | -0.27816600 | 0.02851700  | Sum of electronic and zero-point Energies=   | -427.062714                 |
| H                     | -0.51848900 | -1.36824800 | 0.68525300  | Sum of electronic and thermal Energies=      | -427.050298                 |
| H                     | -0.16296600 | -0.04329900 | 1.81162300  | Sum of electronic and thermal Enthalpies=    | -427.049354                 |
| H                     | -1.40375900 | 0.16668100  | 0.55864100  | Sum of electronic and thermal Free Energies= | -427.100751                 |
| H                     | 0.24008500  | -1.14216900 | -1.78854000 |                                              |                             |
| H                     | 1.11969200  | 0.31969800  | -2.27960800 |                                              |                             |
| H                     | -0.62432800 | 0.40225900  | -1.94728000 |                                              |                             |
| H                     | 0.89851900  | 1.85779400  | 0.86740900  |                                              |                             |
| O                     | 3.00135500  | -0.75366600 | 0.00867300  |                                              |                             |
| C                     | 3.39093600  | -0.96463800 | 1.34558800  |                                              |                             |
| C                     | 3.15262600  | 0.29162300  | 2.18367000  |                                              |                             |
| C                     | 4.89905700  | -1.25118300 | 1.24179800  |                                              |                             |
| C                     | 2.65924300  | -2.16765700 | 1.93679100  |                                              |                             |
| H                     | 2.07995300  | 0.47026400  | 2.30524800  |                                              |                             |
| H                     | 3.60474200  | 1.16211200  | 1.70163900  |                                              |                             |
| H                     | 3.58925000  | 0.17451100  | 3.17873700  |                                              |                             |
| H                     | 5.42417100  | -0.38836500 | 0.82677000  |                                              |                             |

|                       |             |             |             |                                                          |
|-----------------------|-------------|-------------|-------------|----------------------------------------------------------|
| H                     | 5.29085000  | -1.45841100 | 2.24087400  |                                                          |
| H                     | 5.08067400  | -2.11989900 | 0.60537900  |                                                          |
| H                     | 1.58196500  | -1.98049400 | 1.95678700  |                                                          |
| H                     | 2.99323200  | -2.36052000 | 2.95965700  |                                                          |
| H                     | 2.84704900  | -3.05926400 | 1.33323700  |                                                          |
| <b>Name</b>           |             |             |             | <b>IP-O2-H-OTB- FHT-IP</b>                               |
| Cartesian Coordinates |             |             |             | Frequency and Energy                                     |
| O                     | 0.62270300  | 1.41526000  | -1.42820300 | Zero-point correction= 0.226163 (Hartree/Particle)       |
| C                     | 0.88807800  | 0.31197900  | -0.60070200 | Thermal correction to Energy= 0.238544                   |
| C                     | 1.59253100  | 0.71907600  | 0.68392900  | Thermal correction to Enthalpy= 0.239489                 |
| C                     | -0.35220500 | -0.53937600 | -0.35927500 | Thermal correction to Gibbs Free Energy= 0.187579        |
| H                     | 1.59032600  | -0.28396000 | -1.21080200 | Sum of electronic and zero-point Energies= -427.051905   |
| H                     | 1.92170600  | -0.16691300 | 1.23251900  | Sum of electronic and thermal Energies= -427.039523      |
| H                     | 2.46695600  | 1.33428000  | 0.46091400  | Sum of electronic and thermal Enthalpies= -427.038579    |
| H                     | 0.91818100  | 1.28934900  | 1.32846300  | Sum of electronic and thermal Free Energies= -427.090489 |
| H                     | -0.07564900 | -1.46307900 | 0.15306400  |                                                          |
| H                     | -0.83829500 | -0.79235100 | -1.30378700 |                                                          |
| H                     | -1.06214700 | 0.00848400  | 0.26723900  |                                                          |
| H                     | -0.43741800 | 1.88394200  | -1.33297100 |                                                          |
| O                     | -1.49142600 | 2.33746600  | -1.14072200 |                                                          |
| C                     | -1.56925500 | 3.35254600  | -0.16347800 |                                                          |
| C                     | -2.74373000 | 4.22735700  | -0.64544100 |                                                          |
| C                     | -0.28483000 | 4.17695200  | -0.12920100 |                                                          |
| C                     | -1.88980700 | 2.75437900  | 1.20258800  |                                                          |
| H                     | -3.65500800 | 3.63095300  | -0.72291100 |                                                          |
| H                     | -2.51713000 | 4.66522000  | -1.61924900 |                                                          |
| H                     | -2.90554000 | 5.02831700  | 0.07989600  |                                                          |
| H                     | -0.04056200 | 4.54659200  | -1.12815400 |                                                          |
| H                     | -0.40753300 | 5.03004800  | 0.54186600  |                                                          |
| H                     | 0.54686700  | 3.56640000  | 0.23237900  |                                                          |
| H                     | -2.80666200 | 2.16182500  | 1.15063900  |                                                          |
| H                     | -2.02607900 | 3.54517800  | 1.94456200  |                                                          |
| H                     | -1.07505900 | 2.10771900  | 1.53645200  |                                                          |
| <b>Name</b>           |             |             |             | <b>IP-C1-H-OCM- FHT-IP</b>                               |
| Cartesian Coordinates |             |             |             | Frequency and Energy                                     |
| O                     | 3.46888700  | -4.41227400 | -3.39739100 | Zero-point correction= 0.281251 (Hartree/Particle)       |
| C                     | 3.76970100  | -3.50120100 | -2.33947200 | Thermal correction to Energy= 0.296650                   |
| C                     | 4.01509500  | -2.10059900 | -2.87823800 | Thermal correction to Enthalpy= 0.297595                 |
| C                     | 2.69439400  | -3.53979500 | -1.28048500 | Thermal correction to Gibbs Free Energy= 0.237128        |
| H                     | 4.69565600  | -3.88518100 | -1.89473300 | Sum of electronic and zero-point Energies= -618.712996   |
| H                     | 4.29121400  | -1.41964800 | -2.06945100 | Sum of electronic and thermal Energies= -618.697596      |
| H                     | 4.82285800  | -2.11463800 | -3.61290900 | Sum of electronic and thermal Enthalpies= -618.696652    |
| H                     | 3.10992100  | -1.71803800 | -3.35964300 | Sum of electronic and thermal Free Energies= -618.757119 |
| H                     | 2.86178600  | -2.85495400 | -0.44789100 |                                                          |
| H                     | 2.44751000  | -4.54703000 | -0.94057100 |                                                          |
| H                     | 1.65236200  | -3.15615800 | -1.82334200 |                                                          |
| H                     | 2.66197000  | -4.10796900 | -3.83211300 |                                                          |
| O                     | 0.53391200  | -2.75131300 | -2.35107800 |                                                          |
| C                     | 0.01799900  | -1.75819900 | -1.48673700 |                                                          |
| C                     | -0.16949600 | -2.32084500 | -0.07604300 |                                                          |
| C                     | 0.89898600  | -0.51041100 | -1.52833000 |                                                          |
| C                     | -1.36507700 | -1.43987200 | -2.08655900 |                                                          |
| C                     | -0.04265000 | -1.52213800 | 1.06168900  |                                                          |
| C                     | -0.51302900 | -3.66633600 | 0.08638000  |                                                          |



|                       |             |             |             |                                                          |
|-----------------------|-------------|-------------|-------------|----------------------------------------------------------|
| C                     | -0.24813100 | -2.05753400 | 2.33263700  |                                                          |
| C                     | -0.71730300 | -4.20196700 | 1.35352500  |                                                          |
| C                     | -0.58470400 | -3.39823400 | 2.48393700  |                                                          |
| H                     | 1.06242000  | -0.23330300 | -2.57193100 |                                                          |
| H                     | 0.42389400  | 0.33313000  | -1.02435700 |                                                          |
| H                     | 1.86791700  | -0.69871400 | -1.05831100 |                                                          |
| H                     | -1.25137200 | -1.05146800 | -3.10117800 |                                                          |
| H                     | -1.85824700 | -0.68568400 | -1.46882400 |                                                          |
| H                     | -1.98506900 | -2.33809900 | -2.11104900 |                                                          |
| H                     | 0.22161100  | -0.47508900 | 0.97112600  |                                                          |
| H                     | -0.61256900 | -4.29909700 | -0.78850600 |                                                          |
| H                     | -0.14066900 | -1.42185800 | 3.20471700  |                                                          |
| H                     | -0.97896800 | -5.24923000 | 1.45877200  |                                                          |
| H                     | -0.74112700 | -3.81472300 | 3.47269100  |                                                          |
| <b>Name</b>           |             |             |             | <b>IP-C2-H-OCM- FHT-IP</b>                               |
| Cartesian Coordinates |             |             |             | Frequency and Energy                                     |
| O                     | 2.36234700  | -2.90708600 | -0.11327300 | Zero-point correction= 0.282516 (Hartree/Particle)       |
| C                     | 1.87607400  | -3.90214300 | -0.97827900 | Thermal correction to Energy= 0.297835                   |
| C                     | 2.97838100  | -4.74872500 | -1.58136100 | Thermal correction to Enthalpy= 0.298780                 |
| C                     | 0.80873100  | -4.68706600 | -0.25259100 | Thermal correction to Gibbs Free Energy= 0.239730        |
| H                     | 1.36420000  | -3.38903900 | -1.90441400 | Sum of electronic and zero-point Energies= -618.721214   |
| H                     | 2.55858300  | -5.46185800 | -2.29398900 | Sum of electronic and thermal Energies= -618.705894      |
| H                     | 3.70546000  | -4.12310200 | -2.10626900 | Sum of electronic and thermal Enthalpies= -618.704950    |
| H                     | 3.49630000  | -5.30254600 | -0.79145600 | Sum of electronic and thermal Free Energies= -618.764000 |
| H                     | 0.31001900  | -5.37436000 | -0.93879300 |                                                          |
| H                     | 0.06258000  | -4.01706700 | 0.18091400  |                                                          |
| H                     | 1.26950000  | -5.26913400 | 0.55296800  |                                                          |
| H                     | 3.13116000  | -2.48531100 | -0.51698100 |                                                          |
| O                     | 0.77855100  | -2.92976700 | -3.17060500 |                                                          |
| C                     | 0.06570000  | -1.76200800 | -2.83456500 |                                                          |
| C                     | -0.95110100 | -2.09051400 | -1.73740700 |                                                          |
| C                     | 1.03250700  | -0.64046600 | -2.46016900 |                                                          |
| C                     | -0.66968400 | -1.38571800 | -4.13747700 |                                                          |
| C                     | -1.02395800 | -1.37792600 | -0.54155500 |                                                          |
| C                     | -1.81443600 | -3.17542000 | -1.92421200 |                                                          |
| C                     | -1.93839900 | -1.74273000 | 0.44814200  |                                                          |
| C                     | -2.72663300 | -3.53939500 | -0.94198300 |                                                          |
| C                     | -2.79091800 | -2.82259400 | 0.25268500  |                                                          |
| H                     | 1.74027900  | -0.50314500 | -3.28039600 |                                                          |
| H                     | 0.50548100  | 0.30239400  | -2.29766800 |                                                          |
| H                     | 1.59050000  | -0.89022800 | -1.55542300 |                                                          |
| H                     | 0.05679400  | -1.18203200 | -4.92694800 |                                                          |
| H                     | -1.26345300 | -0.48584300 | -3.95913900 |                                                          |
| H                     | -1.33212200 | -2.18997100 | -4.46018900 |                                                          |
| H                     | -0.36418500 | -0.53792200 | -0.36067700 |                                                          |
| H                     | -1.75613700 | -3.75279000 | -2.84091500 |                                                          |
| H                     | -1.97666700 | -1.17976100 | 1.37430000  |                                                          |
| H                     | -3.38477400 | -4.38606000 | -1.10416000 |                                                          |
| H                     | -3.49900000 | -3.10678400 | 1.02309100  |                                                          |
| <b>Name</b>           |             |             |             | <b>IP-O2-H-OCM- FHT-IP</b>                               |
| Cartesian Coordinates |             |             |             | Frequency and Energy                                     |
| O                     | 1.33483600  | -3.59097000 | -0.46097800 | Zero-point correction= 0.280459 (Hartree/Particle)       |
| C                     | 2.67981600  | -3.99946200 | -0.36120900 | Thermal correction to Energy= 0.295912                   |
| C                     | 2.95728500  | -5.24613700 | -1.18679100 | Thermal correction to Enthalpy= 0.296857                 |

|                       |             |             |             |                                              |                             |
|-----------------------|-------------|-------------|-------------|----------------------------------------------|-----------------------------|
| C                     | 3.63956100  | -2.85782000 | -0.67144300 | Thermal correction to Gibbs Free Energy=     | 0.236225                    |
| H                     | 2.77370100  | -4.24650000 | 0.70980200  | Sum of electronic and zero-point Energies=   | -618.710586                 |
| H                     | 3.96613900  | -5.61491800 | -0.98883100 | Sum of electronic and thermal Energies=      | -618.695132                 |
| H                     | 2.24328600  | -6.03597100 | -0.94384900 | Sum of electronic and thermal Enthalpies=    | -618.694188                 |
| H                     | 2.87968100  | -5.01644300 | -2.25361600 | Sum of electronic and thermal Free Energies= | -618.754819                 |
| H                     | 4.66798600  | -3.16798100 | -0.47283100 |                                              |                             |
| H                     | 3.41230600  | -1.98429800 | -0.05738700 |                                              |                             |
| H                     | 3.55637100  | -2.58228900 | -1.72684600 |                                              |                             |
| H                     | 1.01054100  | -3.53294600 | -1.57186800 |                                              |                             |
| O                     | 0.91144900  | -3.16307800 | -2.67698500 |                                              |                             |
| C                     | 0.20790800  | -1.93934000 | -2.72008800 |                                              |                             |
| C                     | -1.06696900 | -2.03227900 | -1.88203800 |                                              |                             |
| C                     | 1.12993400  | -0.79129100 | -2.31387300 |                                              |                             |
| C                     | -0.17082700 | -1.79347100 | -4.20975400 |                                              |                             |
| C                     | -1.53817600 | -0.96388800 | -1.11883200 |                                              |                             |
| C                     | -1.80539100 | -3.21964100 | -1.90230600 |                                              |                             |
| C                     | -2.72103800 | -1.08086800 | -0.38946800 |                                              |                             |
| C                     | -2.98331300 | -3.33850200 | -1.17384300 |                                              |                             |
| C                     | -3.44654400 | -2.26643900 | -0.41330900 |                                              |                             |
| H                     | 2.04723800  | -0.85305700 | -2.90230900 |                                              |                             |
| H                     | 0.66252100  | 0.17571600  | -2.50837000 |                                              |                             |
| H                     | 1.38310400  | -0.85722900 | -1.25314500 |                                              |                             |
| H                     | 0.73342100  | -1.74532900 | -4.81987400 |                                              |                             |
| H                     | -0.74186400 | -0.87114500 | -4.33766200 |                                              |                             |
| H                     | -0.78163200 | -2.63819400 | -4.53258400 |                                              |                             |
| H                     | -0.98757900 | -0.03170200 | -1.07871400 |                                              |                             |
| H                     | -1.44973200 | -4.05949900 | -2.48981700 |                                              |                             |
| H                     | -3.07032400 | -0.24118300 | 0.20125900  |                                              |                             |
| H                     | -3.54068900 | -4.26838200 | -1.19915300 |                                              |                             |
| H                     | -4.36470600 | -2.35694600 | 0.15616200  |                                              |                             |
| <b>Name</b>           |             |             |             | <b>TL-C5-H-OTB-FHT-TL</b>                    |                             |
| Cartesian Coordinates |             |             |             | Frequency and Energy                         |                             |
| C                     | -0.86735100 | 0.50867500  | 0.29678600  | Zero-point correction=                       | 0.248098 (Hartree/Particle) |
| C                     | 0.37415700  | 1.13265400  | 0.33299500  | Thermal correction to Energy=                | 0.261257                    |
| C                     | 0.53652000  | 2.43575200  | -0.15179400 | Thermal correction to Enthalpy=              | 0.262201                    |
| C                     | -0.58025900 | 3.09431200  | -0.68291200 | Thermal correction to Gibbs Free Energy=     | 0.206359                    |
| C                     | -1.82057000 | 2.47137400  | -0.72225400 | Sum of electronic and zero-point Energies=   | -504.216522                 |
| C                     | -1.96882300 | 1.17560700  | -0.23218900 | Sum of electronic and thermal Energies=      | -504.203362                 |
| H                     | -0.97631700 | -0.49830200 | 0.68304900  | Sum of electronic and thermal Enthalpies=    | -504.202418                 |
| H                     | 1.22914200  | 0.60998900  | 0.74978300  | Sum of electronic and thermal Free Energies= | -504.258261                 |
| H                     | -0.46564100 | 4.10207200  | -1.06883000 |                                              |                             |
| H                     | -2.67444700 | 2.99598800  | -1.13537300 |                                              |                             |
| H                     | -2.93712800 | 0.68982200  | -0.26161300 |                                              |                             |
| C                     | 1.86108500  | 3.09523200  | -0.14448200 |                                              |                             |
| H                     | 2.29913800  | 3.05179500  | -1.27705200 |                                              |                             |
| H                     | 1.82395500  | 4.17026700  | 0.03616800  |                                              |                             |
| H                     | 2.59911400  | 2.60967500  | 0.49337700  |                                              |                             |
| O                     | 2.74190100  | 3.04983500  | -2.54629300 |                                              |                             |
| C                     | 3.67885100  | 2.01549800  | -2.70125300 |                                              |                             |
| C                     | 3.96095100  | 2.01134800  | -4.21377600 |                                              |                             |
| C                     | 3.08448200  | 0.67190100  | -2.27661100 |                                              |                             |
| C                     | 4.96109800  | 2.32225900  | -1.92711600 |                                              |                             |
| H                     | 4.34305000  | 2.98302600  | -4.53197800 |                                              |                             |
| H                     | 3.04774000  | 1.79128800  | -4.76939300 |                                              |                             |

|                       |             |             |             |                                                          |
|-----------------------|-------------|-------------|-------------|----------------------------------------------------------|
| H                     | 4.70815700  | 1.24622000  | -4.43920900 |                                                          |
| H                     | 2.12475000  | 0.50963000  | -2.77252900 |                                                          |
| H                     | 3.75945400  | -0.14856500 | -2.53344000 |                                                          |
| H                     | 2.92011900  | 0.65045500  | -1.19609400 |                                                          |
| H                     | 5.37244200  | 3.28284100  | -2.24506400 |                                                          |
| H                     | 5.71288600  | 1.54586300  | -2.09157400 |                                                          |
| H                     | 4.75391900  | 2.37460000  | -0.85472800 |                                                          |
| <b>Name</b>           |             |             |             | <b>TL-C5-H-OCM-FHT-TL</b>                                |
| Cartesian Coordinates |             |             |             | Frequency and Energy                                     |
| C                     | -0.13731900 | -0.30794400 | -1.16620100 | Zero-point correction= 0.301566 (Hartree/Particle)       |
| C                     | 0.87258000  | 0.61611400  | -0.93549000 | Thermal correction to Energy= 0.316879                   |
| C                     | 0.58261700  | 1.86266300  | -0.36196400 | Thermal correction to Enthalpy= 0.317824                 |
| C                     | -0.73984800 | 2.14552200  | -0.00305800 | Thermal correction to Gibbs Free Energy= 0.257384        |
| C                     | -1.74989500 | 1.21542600  | -0.22503900 | Sum of electronic and zero-point Energies= -695.874096   |
| C                     | -1.45322400 | -0.01012600 | -0.81429500 | Sum of electronic and thermal Energies= -695.858782      |
| H                     | 0.10148900  | -1.26557400 | -1.61516500 | Sum of electronic and thermal Enthalpies= -695.857838    |
| H                     | 1.89843700  | 0.37767700  | -1.20055100 | Sum of electronic and thermal Free Energies= -695.918278 |
| H                     | -0.96941900 | 3.10110900  | 0.45814000  |                                                          |
| H                     | -2.76888000 | 1.44619800  | 0.06415200  |                                                          |
| H                     | -2.24086900 | -0.73346800 | -0.99118300 |                                                          |
| C                     | 1.65645500  | 2.85489500  | -0.13613200 |                                                          |
| H                     | 2.05688400  | 3.30352100  | -1.19748700 |                                                          |
| H                     | 1.33074900  | 3.74915300  | 0.39557200  |                                                          |
| H                     | 2.55133600  | 2.42890500  | 0.31692100  |                                                          |
| O                     | 2.62256700  | 4.09225800  | -2.17371400 |                                                          |
| C                     | 2.62338400  | 3.40814400  | -3.39913300 |                                                          |
| C                     | 3.45415700  | 2.12538000  | -3.29674300 |                                                          |
| C                     | 1.20422400  | 3.15958700  | -3.90410500 |                                                          |
| C                     | 3.33941000  | 4.39287600  | -4.35432600 |                                                          |
| C                     | 3.03521500  | 0.91340900  | -3.84457100 |                                                          |
| C                     | 4.67036400  | 2.16217600  | -2.60932900 |                                                          |
| C                     | 3.80533100  | -0.23904500 | -3.69494100 |                                                          |
| C                     | 5.43860800  | 1.01465700  | -2.45494000 |                                                          |
| C                     | 5.00531800  | -0.19451400 | -2.99526800 |                                                          |
| H                     | 0.63785600  | 4.08726700  | -3.82933300 |                                                          |
| H                     | 1.20301700  | 2.84276200  | -4.94959500 |                                                          |
| H                     | 0.70493700  | 2.39204300  | -3.30420100 |                                                          |
| H                     | 2.76095300  | 5.31453700  | -4.44273100 |                                                          |
| H                     | 3.42674600  | 3.92589900  | -5.33815600 |                                                          |
| H                     | 4.33813500  | 4.62925300  | -3.98532300 |                                                          |
| H                     | 2.09274600  | 0.84858200  | -4.37409600 |                                                          |
| H                     | 5.00492300  | 3.10044800  | -2.18127000 |                                                          |
| H                     | 3.45865700  | -1.17344000 | -4.12167100 |                                                          |
| H                     | 6.37451600  | 1.06103000  | -1.90957100 |                                                          |
| H                     | 5.60032500  | -1.09204600 | -2.87224800 |                                                          |
| <b>Name</b>           |             |             |             | <b>NVP-C7-C2-IP-RAF-IP</b>                               |
| Cartesian Coordinates |             |             |             | Frequency and Energy                                     |
| O                     | -0.84732800 | -1.75951600 | -0.81581300 | Zero-point correction= 0.240432 (Hartree/Particle)       |
| N                     | 0.36422700  | 0.11010400  | -0.26191200 | Thermal correction to Energy= 0.253933                   |
| C                     | -1.25947300 | 1.37381800  | 0.86861700  | Thermal correction to Enthalpy= 0.254877                 |
| C                     | 0.13157800  | 1.46872700  | 0.23041600  | Thermal correction to Gibbs Free Energy= 0.199301        |
| C                     | -1.93676500 | 0.23715500  | 0.10077400  | Sum of electronic and zero-point Energies= -557.421791   |
| C                     | -0.78258400 | -0.61662800 | -0.37324000 | Sum of electronic and thermal Energies= -557.408291      |
| C                     | 1.59583000  | -0.33382800 | -0.74707500 | Sum of electronic and thermal Enthalpies= -557.407347    |

|                       |                            |             |             |                                                          |
|-----------------------|----------------------------|-------------|-------------|----------------------------------------------------------|
| C                     | 2.75777000                 | 0.35432300  | -0.60967000 | Sum of electronic and thermal Free Energies= -557.462923 |
| H                     | -1.79853000                | 2.31773100  | 0.80719700  |                                                          |
| H                     | -1.15713800                | 1.10018900  | 1.92069400  |                                                          |
| H                     | 0.16104800                 | 2.16938200  | -0.61093400 |                                                          |
| H                     | 0.90240300                 | 1.75159000  | 0.94714900  |                                                          |
| H                     | -2.46080800                | 0.59868800  | -0.79048300 |                                                          |
| H                     | -2.63711000                | -0.35504300 | 0.68911000  |                                                          |
| H                     | 1.55872300                 | -1.32204300 | -1.18861600 |                                                          |
| H                     | 3.63065800                 | -0.01345400 | -1.13539900 |                                                          |
| H                     | 2.77224800                 | 1.39347000  | -0.29895300 |                                                          |
| O                     | 3.86497500                 | -1.66921200 | 1.15856600  |                                                          |
| C                     | 3.76546400                 | -0.30472300 | 1.33841800  |                                                          |
| C                     | 2.77952400                 | 0.13210500  | 2.37134100  |                                                          |
| C                     | 5.09617500                 | 0.35994500  | 1.26528900  |                                                          |
| H                     | 2.70356000                 | 1.22115000  | 2.39527300  |                                                          |
| H                     | 1.78691300                 | -0.28464100 | 2.16474200  |                                                          |
| H                     | 3.08620200                 | -0.21072800 | 3.37033500  |                                                          |
| H                     | 4.97982700                 | 1.44512300  | 1.22559300  |                                                          |
| H                     | 5.64684000                 | 0.03149200  | 0.37986800  |                                                          |
| H                     | 5.70583400                 | 0.11897700  | 2.14863500  |                                                          |
| H                     | 2.98029200                 | -2.05795300 | 1.18751100  |                                                          |
| <b>Name</b>           | <b>NVP-C7-C5-TL-RAF-IP</b> |             |             |                                                          |
| Cartesian Coordinates | Frequency and Energy       |             |             |                                                          |
| O                     | -0.97835100                | -1.85199400 | -0.24646300 | Zero-point correction= 0.261822 (Hartree/Particle)       |
| N                     | 0.43303900                 | -0.05135700 | -0.02292800 | Thermal correction to Energy= 0.275751                   |
| C                     | -1.12498600                | 1.68086000  | 0.27913200  | Thermal correction to Enthalpy= 0.276695                 |
| C                     | 0.36066900                 | 1.40602400  | 0.00096400  | Thermal correction to Gibbs Free Energy= 0.217375        |
| C                     | -1.84070300                | 0.44240700  | -0.26420100 | Sum of electronic and zero-point Energies= -634.573480   |
| C                     | -0.79978400                | -0.65595200 | -0.17369000 | Sum of electronic and thermal Energies= -634.559551      |
| C                     | 1.61592300                 | -0.76684400 | 0.00597700  | Sum of electronic and thermal Enthalpies= -634.558607    |
| C                     | 2.84959400                 | -0.19404700 | -0.09884600 | Sum of electronic and thermal Free Energies= -634.617928 |
| H                     | -1.45895500                | 2.60951900  | -0.18064900 |                                                          |
| H                     | -1.28222800                | 1.75562500  | 1.35645900  |                                                          |
| H                     | 0.68646400                 | 1.81283100  | -0.96273200 |                                                          |
| H                     | 1.01296500                 | 1.80202000  | 0.78109200  |                                                          |
| H                     | -2.10811000                | 0.55173900  | -1.32009700 |                                                          |
| H                     | -2.73964200                | 0.16096900  | 0.28229300  |                                                          |
| H                     | 1.46983700                 | -1.83996900 | 0.00779300  |                                                          |
| H                     | 3.71766300                 | -0.81526000 | 0.08052900  |                                                          |
| H                     | 2.98693900                 | 0.87045300  | 0.05052700  |                                                          |
| C                     | 5.66794600                 | 2.97420600  | -2.13860600 |                                                          |
| C                     | 4.50871800                 | 2.21891200  | -2.22734000 |                                                          |
| C                     | 4.55684400                 | 0.80870800  | -2.22263000 |                                                          |
| C                     | 5.82260900                 | 0.19622100  | -2.10820800 |                                                          |
| C                     | 6.97845000                 | 0.95648000  | -2.01906900 |                                                          |
| C                     | 6.91113200                 | 2.34992600  | -2.03410800 |                                                          |
| H                     | 5.60651700                 | 4.05673400  | -2.15303900 |                                                          |
| H                     | 3.54526900                 | 2.71235400  | -2.31251100 |                                                          |
| H                     | 5.88332800                 | -0.88751100 | -2.09809300 |                                                          |
| H                     | 7.94054100                 | 0.46287700  | -1.93889400 |                                                          |
| H                     | 7.81608300                 | 2.94172800  | -1.96617500 |                                                          |
| C                     | 3.35361200                 | 0.02547100  | -2.24961400 |                                                          |
| H                     | 3.42636800                 | -1.03408000 | -2.46405000 |                                                          |
| H                     | 2.42975900                 | 0.50380300  | -2.55457700 |                                                          |

| Name                  |             |             |             | NVP-C7-OTB-RAF-IP                            |                             |
|-----------------------|-------------|-------------|-------------|----------------------------------------------|-----------------------------|
| Cartesian Coordinates |             |             |             | Frequency and Energy                         |                             |
| O                     | 0.33253100  | -2.04930000 | 0.07907200  | Zero-point correction=                       | 0.269281 (Hartree/Particle) |
| N                     | 0.58290600  | 0.23197800  | -0.06131700 | Thermal correction to Energy=                | 0.283803                    |
| C                     | -1.56517800 | 0.93768600  | 0.57471500  | Thermal correction to Enthalpy=              | 0.284748                    |
| C                     | -0.25548600 | 1.43463700  | -0.05001400 | Thermal correction to Gibbs Free Energy=     | 0.225863                    |
| C                     | -1.60135000 | -0.55120100 | 0.22435000  | Sum of electronic and zero-point Energies=   | -596.683056                 |
| C                     | -0.14722400 | -0.93075300 | 0.08873900  | Sum of electronic and thermal Energies=      | -596.668533                 |
| C                     | 1.93281900  | 0.23411300  | -0.30364300 | Sum of electronic and thermal Enthalpies=    | -596.667589                 |
| C                     | 2.66552200  | 1.36239400  | -0.49347100 | Sum of electronic and thermal Free Energies= | -596.726473                 |
| H                     | -2.42522600 | 1.48734300  | 0.19689200  |                                              |                             |
| H                     | -1.52028400 | 1.06199700  | 1.65793100  |                                              |                             |
| H                     | -0.39048600 | 1.79086100  | -1.07582700 |                                              |                             |
| H                     | 0.22376200  | 2.21695900  | 0.53785100  |                                              |                             |
| H                     | -2.06989900 | -0.73130700 | -0.74923100 |                                              |                             |
| H                     | -2.09394000 | -1.18338500 | 0.96195300  |                                              |                             |
| H                     | 2.38863900  | -0.74850900 | -0.27424100 |                                              |                             |
| H                     | 3.70940600  | 1.25884000  | -0.75510900 |                                              |                             |
| H                     | 2.20058300  | 2.32484300  | -0.65634400 |                                              |                             |
| O                     | 2.91248100  | 1.94142800  | 1.57022900  |                                              |                             |
| C                     | 4.13412900  | 1.52102900  | 2.11883100  |                                              |                             |
| C                     | 4.02001800  | 1.90343300  | 3.60745300  |                                              |                             |
| C                     | 5.31708600  | 2.26013800  | 1.48958000  |                                              |                             |
| C                     | 4.31680000  | 0.00525800  | 2.00040400  |                                              |                             |
| H                     | 3.19075100  | 1.36752500  | 4.07471800  |                                              |                             |
| H                     | 3.85129300  | 2.97774400  | 3.71281700  |                                              |                             |
| H                     | 4.94662400  | 1.64245900  | 4.12568000  |                                              |                             |
| H                     | 5.17842700  | 3.34062800  | 1.58372100  |                                              |                             |
| H                     | 6.25390500  | 1.98671500  | 1.98314800  |                                              |                             |
| H                     | 5.41033300  | 2.01467700  | 0.42862900  |                                              |                             |
| H                     | 3.43441700  | -0.51308800 | 2.38511400  |                                              |                             |
| H                     | 5.19075400  | -0.31857200 | 2.57235600  |                                              |                             |
| H                     | 4.46646200  | -0.28452700 | 0.95715500  |                                              |                             |
| Name                  |             |             |             | NVP-C7-OTB-RAF-TL                            |                             |
| Cartesian Coordinates |             |             |             | Frequency and Energy                         |                             |
| O                     | 0.38840900  | -2.05229800 | -0.14891800 | Zero-point correction=                       | 0.269954 (Hartree/Particle) |
| N                     | 0.66614300  | 0.23125600  | -0.13139400 | Thermal correction to Energy=                | 0.284372                    |
| C                     | -1.39141700 | 0.89973700  | 0.77633500  | Thermal correction to Enthalpy=              | 0.285316                    |
| C                     | -0.13692100 | 1.43593600  | 0.07163600  | Thermal correction to Gibbs Free Energy=     | 0.227140                    |
| C                     | -1.49792700 | -0.54848800 | 0.29286400  | Sum of electronic and zero-point Energies=   | -596.674949                 |
| C                     | -0.06638300 | -0.94145700 | -0.00847500 | Sum of electronic and thermal Energies=      | -596.660531                 |
| C                     | 1.99910900  | 0.24250200  | -0.44495400 | Sum of electronic and thermal Enthalpies=    | -596.659587                 |
| C                     | 2.72326900  | 1.38434200  | -0.60093200 | Sum of electronic and thermal Free Energies= | -596.717763                 |
| H                     | -2.27249800 | 1.49651700  | 0.54680200  |                                              |                             |
| H                     | -1.23323000 | 0.91866300  | 1.85598400  |                                              |                             |
| H                     | -0.36959200 | 1.89108100  | -0.89708700 |                                              |                             |
| H                     | 0.42375500  | 2.14675900  | 0.67843300  |                                              |                             |
| H                     | -2.05972200 | -0.62687400 | -0.64366000 |                                              |                             |
| H                     | -1.93878600 | -1.23944100 | 1.00955000  |                                              |                             |
| H                     | 2.44713500  | -0.74337300 | -0.47997900 |                                              |                             |
| H                     | 3.76102100  | 1.30141400  | -0.89296000 |                                              |                             |
| H                     | 2.24967300  | 2.34508800  | -0.74011500 |                                              |                             |
| O                     | 2.88006700  | 1.97944200  | 1.41342500  |                                              |                             |
| C                     | 4.03083000  | 1.52787200  | 2.06518800  |                                              |                             |

|                       |             |             |             |                                                          |
|-----------------------|-------------|-------------|-------------|----------------------------------------------------------|
| C                     | 3.83018800  | 1.98646300  | 3.52265600  |                                                          |
| C                     | 5.29490400  | 2.17785500  | 1.49508400  |                                                          |
| C                     | 4.14793100  | 0.00024800  | 2.02996700  |                                                          |
| H                     | 2.94209900  | 1.51395600  | 3.94705900  |                                                          |
| H                     | 3.70416500  | 3.07036800  | 3.56296500  |                                                          |
| H                     | 4.70069400  | 1.71094500  | 4.12398500  |                                                          |
| H                     | 5.19823800  | 3.26601600  | 1.51723500  |                                                          |
| H                     | 6.17959200  | 1.89376200  | 2.07200500  |                                                          |
| H                     | 5.45735500  | 1.86844300  | 0.45958500  |                                                          |
| H                     | 3.20774700  | -0.45635000 | 2.34912100  |                                                          |
| H                     | 4.94809400  | -0.34238900 | 2.69201500  |                                                          |
| H                     | 4.37663400  | -0.34595400 | 1.01872000  |                                                          |
| <b>Name</b>           |             |             |             | <b>NVP-C7-OCM-RAF-IP</b>                                 |
| Cartesian Coordinates |             |             |             | Frequency and Energy                                     |
| O                     | -1.74812600 | -0.35318600 | -5.36624300 | Zero-point correction= 0.322758 (Hartree/Particle)       |
| N                     | -0.60879200 | 1.56332000  | -5.92830000 | Thermal correction to Energy= 0.340328                   |
| C                     | -2.39643000 | 2.96106100  | -6.53424500 | Thermal correction to Enthalpy= 0.341272                 |
| C                     | -0.86831500 | 2.84326000  | -6.59425500 | Thermal correction to Gibbs Free Energy= 0.274243        |
| C                     | -2.87823800 | 1.50970700  | -6.48781300 | Sum of electronic and zero-point Energies= -788.342427   |
| C                     | -1.73263600 | 0.76377500  | -5.84887100 | Sum of electronic and thermal Energies= -788.324858      |
| C                     | 0.63170900  | 1.14151000  | -5.52324500 | Sum of electronic and thermal Enthalpies= -788.323913    |
| C                     | 1.75862600  | 1.89007300  | -5.63573200 | Sum of electronic and thermal Free Energies= -788.390943 |
| H                     | -2.79091600 | 3.51604000  | -7.38330800 |                                                          |
| H                     | -2.68458600 | 3.47625700  | -5.61642800 |                                                          |
| H                     | -0.49250800 | 2.79937400  | -7.62100300 |                                                          |
| H                     | -0.36075000 | 3.64908300  | -6.06455500 |                                                          |
| H                     | -3.01097000 | 1.09056600  | -7.49104700 |                                                          |
| H                     | -3.79834700 | 1.35005700  | -5.92723700 |                                                          |
| H                     | 0.63385500  | 0.16822700  | -5.04626500 |                                                          |
| H                     | 2.70470300  | 1.45003400  | -5.34921300 |                                                          |
| H                     | 1.78465600  | 2.80164300  | -6.21725600 |                                                          |
| O                     | 1.48551800  | 3.11002500  | -3.84814600 |                                                          |
| C                     | 2.33552600  | 2.64683000  | -2.84192600 |                                                          |
| C                     | 3.80747000  | 2.78129100  | -3.24839300 |                                                          |
| C                     | 2.07181800  | 3.60671200  | -1.65749100 |                                                          |
| C                     | 1.96457700  | 1.22120200  | -2.41809200 |                                                          |
| C                     | 4.79712000  | 1.93000800  | -2.75267100 |                                                          |
| C                     | 4.18824700  | 3.81123500  | -4.11334800 |                                                          |
| C                     | 6.13232300  | 2.09937500  | -3.11766900 |                                                          |
| C                     | 5.51938800  | 3.98252500  | -4.47922000 |                                                          |
| C                     | 6.49897900  | 3.12451800  | -3.98299100 |                                                          |
| H                     | 1.03192700  | 3.51862000  | -1.33444600 |                                                          |
| H                     | 2.72952500  | 3.34678900  | -0.82430600 |                                                          |
| H                     | 2.27032600  | 4.63846900  | -1.95513800 |                                                          |
| H                     | 0.88256900  | 1.17143000  | -2.27739900 |                                                          |
| H                     | 2.44456600  | 0.94317800  | -1.47749200 |                                                          |
| H                     | 2.25366000  | 0.49617700  | -3.18290100 |                                                          |
| H                     | 4.53733700  | 1.12251600  | -2.07789200 |                                                          |
| H                     | 3.42852300  | 4.47687200  | -4.50767600 |                                                          |
| H                     | 6.88475600  | 1.42417000  | -2.72474000 |                                                          |
| H                     | 5.79304700  | 4.78604700  | -5.15455400 |                                                          |
| H                     | 7.53668600  | 3.25429100  | -4.26933300 |                                                          |
| <b>Name</b>           |             |             |             | <b>NVP-C7-OCM-RAF-TL</b>                                 |
| Cartesian Coordinates |             |             |             | Frequency and Energy                                     |

|                       |             |             |             |                                              |                             |
|-----------------------|-------------|-------------|-------------|----------------------------------------------|-----------------------------|
| O                     | -1.58086600 | -0.46790800 | -5.53067200 | Zero-point correction=                       | 0.323436 (Hartree/Particle) |
| N                     | -0.53220000 | 1.53289500  | -5.96635700 | Thermal correction to Energy=                | 0.340977                    |
| C                     | -2.39475400 | 2.93406800  | -6.23559600 | Thermal correction to Enthalpy=              | 0.341921                    |
| C                     | -0.87343500 | 2.87424800  | -6.43608000 | Thermal correction to Gibbs Free Energy=     | 0.274669                    |
| C                     | -2.84047900 | 1.47379600  | -6.34118200 | Sum of electronic and zero-point Energies=   | -788.335367                 |
| C                     | -1.63018400 | 0.68641200  | -5.88390900 | Sum of electronic and thermal Energies=      | -788.317826                 |
| C                     | 0.74008400  | 1.12598400  | -5.66570500 | Sum of electronic and thermal Enthalpies=    | -788.316882                 |
| C                     | 1.83242700  | 1.92774200  | -5.77672100 | Sum of electronic and thermal Free Energies= | -788.384134                 |
| H                     | -2.87504500 | 3.58516800  | -6.96389800 |                                              |                             |
| H                     | -2.61098100 | 3.31545300  | -5.23620700 |                                              |                             |
| H                     | -0.58990200 | 2.97954800  | -7.48875800 |                                              |                             |
| H                     | -0.33533200 | 3.61437800  | -5.84362800 |                                              |                             |
| H                     | -3.04452500 | 1.18220600  | -7.37664600 |                                              |                             |
| H                     | -3.71112200 | 1.21621500  | -5.74034900 |                                              |                             |
| H                     | 0.79200800  | 0.12275500  | -5.25931400 |                                              |                             |
| H                     | 2.80771500  | 1.51755400  | -5.55003400 |                                              |                             |
| H                     | 1.80496900  | 2.85688300  | -6.32768900 |                                              |                             |
| O                     | 1.52077100  | 3.14121400  | -4.04908300 |                                              |                             |
| C                     | 2.28992600  | 2.68569800  | -2.98222100 |                                              |                             |
| C                     | 3.78933800  | 2.77852900  | -3.29137300 |                                              |                             |
| C                     | 1.96989900  | 3.67891100  | -1.84030500 |                                              |                             |
| C                     | 1.86395800  | 1.27713900  | -2.54772200 |                                              |                             |
| C                     | 4.73053100  | 1.94486100  | -2.68522800 |                                              |                             |
| C                     | 4.24188300  | 3.75497100  | -4.18215400 |                                              |                             |
| C                     | 6.08897800  | 2.08041400  | -2.96530400 |                                              |                             |
| C                     | 5.59649800  | 3.89285600  | -4.46317000 |                                              |                             |
| C                     | 6.52735800  | 3.05391000  | -3.85540000 |                                              |                             |
| H                     | 0.90947600  | 3.61788800  | -1.58638500 |                                              |                             |
| H                     | 2.56750600  | 3.43407200  | -0.95887700 |                                              |                             |
| H                     | 2.20534900  | 4.69774200  | -2.15278400 |                                              |                             |
| H                     | 0.77335400  | 1.24280000  | -2.50870100 |                                              |                             |
| H                     | 2.25035200  | 1.02239700  | -1.55841900 |                                              |                             |
| H                     | 2.21312300  | 0.52366200  | -3.25768600 |                                              |                             |
| H                     | 4.41223500  | 1.17675900  | -1.98986200 |                                              |                             |
| H                     | 3.51318100  | 4.39936600  | -4.66058200 |                                              |                             |
| H                     | 6.80362200  | 1.41962000  | -2.48752100 |                                              |                             |
| H                     | 5.92754100  | 4.65517300  | -5.15973300 |                                              |                             |
| H                     | 7.58356900  | 3.15770400  | -4.07558300 |                                              |                             |
| <b>Name</b>           |             |             |             | <b>IP-C2-C7-NVP-C7-NVP-RAF-IP</b>            |                             |
| Cartesian Coordinates |             |             |             | Frequency and Energy                         |                             |
| O                     | 2.63647400  | 1.69459800  | 0.87068500  | Zero-point correction=                       | 0.390740 (Hartree/Particle) |
| N                     | 4.81932900  | 0.99429600  | 0.74787600  | Thermal correction to Energy=                | 0.411495                    |
| C                     | 4.59515100  | -1.27883500 | 1.28402400  | Thermal correction to Enthalpy=              | 0.412439                    |
| C                     | 5.62804300  | -0.15203000 | 1.16168200  | Thermal correction to Gibbs Free Energy=     | 0.340430                    |
| C                     | 3.29465300  | -0.54535500 | 1.61851300  | Sum of electronic and zero-point Energies=   | -921.304273                 |
| C                     | 3.49428000  | 0.83493300  | 1.03702000  | Sum of electronic and thermal Energies=      | -921.283518                 |
| C                     | 5.36532000  | 2.21727400  | 0.37832900  | Sum of electronic and thermal Enthalpies=    | -921.282574                 |
| C                     | 6.69341000  | 2.50797700  | 0.48561200  | Sum of electronic and thermal Free Energies= | -921.354583                 |
| H                     | 4.49766900  | -1.78963700 | 0.32432400  |                                              |                             |
| H                     | 6.11165700  | 0.07195600  | 2.11806600  |                                              |                             |
| H                     | 6.39648300  | -0.35884400 | 0.41560700  |                                              |                             |
| H                     | 3.16037800  | -0.41894400 | 2.69801300  |                                              |                             |
| H                     | 2.39426500  | -1.00817200 | 1.21490700  |                                              |                             |
| H                     | 4.63029100  | 2.96069800  | 0.09470300  |                                              |                             |

|                       |             |             |             |                                                          |
|-----------------------|-------------|-------------|-------------|----------------------------------------------------------|
| H                     | 7.04336600  | 3.44139200  | 0.06023600  |                                                          |
| H                     | 7.43339600  | 1.72501500  | 0.60788800  |                                                          |
| O                     | 4.77699700  | 1.92081500  | 3.70199500  |                                                          |
| N                     | 5.86686100  | 3.80024400  | 2.94629700  |                                                          |
| C                     | 4.19020100  | 5.42247200  | 3.19909300  |                                                          |
| C                     | 5.51146500  | 5.14251300  | 2.47653400  |                                                          |
| C                     | 3.57279100  | 4.03327000  | 3.36932700  |                                                          |
| C                     | 4.76653900  | 3.10490600  | 3.37411400  |                                                          |
| C                     | 7.04781400  | 3.16159600  | 2.59623500  |                                                          |
| C                     | 8.32048100  | 3.93791400  | 2.46010900  |                                                          |
| H                     | 3.55985700  | 6.11006400  | 2.63745800  |                                                          |
| H                     | 4.39886800  | 5.86119700  | 4.17715600  |                                                          |
| H                     | 5.39078500  | 5.11958600  | 1.38674600  |                                                          |
| H                     | 6.28952400  | 5.86145400  | 2.72873000  |                                                          |
| H                     | 2.94434100  | 3.75491100  | 2.51725800  |                                                          |
| H                     | 2.98537200  | 3.90602000  | 4.27901400  |                                                          |
| H                     | 7.10925700  | 2.15868900  | 3.00452600  |                                                          |
| H                     | 9.00314900  | 3.35028500  | 1.83697400  |                                                          |
| H                     | 8.14636700  | 4.88558000  | 1.94160000  |                                                          |
| O                     | 9.37204100  | 2.98772300  | 4.44192500  |                                                          |
| C                     | 9.06335500  | 4.22724600  | 3.78824100  |                                                          |
| C                     | 8.24783000  | 5.11046300  | 4.72700300  |                                                          |
| C                     | 10.40677200 | 4.87041900  | 3.47936900  |                                                          |
| H                     | 8.03516500  | 6.07652000  | 4.26186900  |                                                          |
| H                     | 7.29800500  | 4.63626300  | 4.99023200  |                                                          |
| H                     | 8.81158700  | 5.28753800  | 5.64655600  |                                                          |
| H                     | 10.26453900 | 5.81864000  | 2.95590200  |                                                          |
| H                     | 11.00945100 | 4.21121300  | 2.84937600  |                                                          |
| H                     | 10.95341100 | 5.06359000  | 4.40585900  |                                                          |
| H                     | 8.54756100  | 2.58334000  | 4.73907200  |                                                          |
| H                     | 4.88258100  | -2.00981600 | 2.03791900  |                                                          |
| <b>Name</b>           |             |             |             | <b>TL-C5-NVP-C7-NVP-RAF-IP</b>                           |
| Cartesian Coordinates |             |             |             | Frequency and Energy                                     |
| O                     | 1.76840100  | -3.29178500 | 0.30100000  | Zero-point correction= 0.412491 (Hartree/Particle)       |
| N                     | 1.75970000  | -1.01810700 | -0.01454800 | Thermal correction to Energy= 0.433990                   |
| C                     | -0.56951200 | -0.61546100 | -0.12126700 | Thermal correction to Enthalpy= 0.434934                 |
| C                     | 0.80602100  | 0.05646500  | -0.28165400 | Thermal correction to Gibbs Free Energy= 0.358849        |
| C                     | -0.29135600 | -2.10943300 | -0.30689300 | Sum of electronic and zero-point Energies= -998.449828   |
| C                     | 1.17629000  | -2.25959600 | 0.03802100  | Sum of electronic and thermal Energies= -998.428329      |
| C                     | 3.05619700  | -0.78718100 | 0.43147300  | Sum of electronic and thermal Enthalpies= -998.427385    |
| C                     | 3.78149800  | 0.41100200  | -0.09621500 | Sum of electronic and thermal Free Energies= -998.503470 |
| H                     | -1.29562600 | -0.22261300 | -0.83173000 |                                                          |
| H                     | -0.94425200 | -0.44169100 | 0.88877800  |                                                          |
| H                     | 0.96217000  | 0.45643100  | -1.28908700 |                                                          |
| H                     | 0.95316400  | 0.86706100  | 0.43547600  |                                                          |
| H                     | -0.43406400 | -2.44325600 | -1.33934900 |                                                          |
| H                     | -0.89185800 | -2.75235300 | 0.33800200  |                                                          |
| H                     | 3.61732400  | -1.71054500 | 0.53273700  |                                                          |
| H                     | 4.69867900  | 0.55303800  | 0.48306900  |                                                          |
| H                     | 3.18251600  | 1.31838500  | 0.03632800  |                                                          |
| C                     | 6.87493100  | 2.77348400  | -2.48903300 |                                                          |
| C                     | 6.23588200  | 1.61092200  | -2.06868200 |                                                          |
| C                     | 4.84410700  | 1.50596900  | -2.10459200 |                                                          |
| C                     | 4.10563800  | 2.59687400  | -2.56925800 |                                                          |



|                       |             |             |             |                                                          |
|-----------------------|-------------|-------------|-------------|----------------------------------------------------------|
| C                     | 4.73976000  | 3.76117200  | -2.99043100 |                                                          |
| C                     | 6.12816100  | 3.85300000  | -2.95098600 |                                                          |
| H                     | 7.95690700  | 2.83501600  | -2.45906300 |                                                          |
| H                     | 6.82345500  | 0.77021600  | -1.71241300 |                                                          |
| H                     | 3.02219300  | 2.52911400  | -2.60613100 |                                                          |
| H                     | 4.15054400  | 4.59574900  | -3.35331800 |                                                          |
| H                     | 6.62453100  | 4.75793400  | -3.28151200 |                                                          |
| C                     | 4.14879100  | 0.27119600  | -1.59205500 |                                                          |
| H                     | 4.79109000  | -0.60419000 | -1.72028300 |                                                          |
| H                     | 3.23614500  | 0.08831100  | -2.16690000 |                                                          |
| O                     | -1.25523700 | -1.32522000 | 3.19534600  |                                                          |
| N                     | 0.97217800  | -1.88637200 | 3.15630300  |                                                          |
| C                     | 0.83840900  | -4.22289500 | 3.36015400  |                                                          |
| C                     | 1.82320200  | -3.04620500 | 3.41036400  |                                                          |
| C                     | -0.50915100 | -3.59999000 | 3.73275600  |                                                          |
| C                     | -0.36728600 | -2.14648500 | 3.32810600  |                                                          |
| C                     | 1.45974600  | -0.61231400 | 2.90646400  |                                                          |
| C                     | 2.76757000  | -0.33991900 | 2.62627500  |                                                          |
| H                     | 1.13795500  | -5.03120600 | 4.02567600  |                                                          |
| H                     | 0.80586200  | -4.60273900 | 2.33820400  |                                                          |
| H                     | 2.30498500  | -2.93697200 | 4.38856400  |                                                          |
| H                     | 2.58645300  | -3.12625700 | 2.63608200  |                                                          |
| H                     | -0.69179400 | -3.62123500 | 4.81223700  |                                                          |
| H                     | -1.36971400 | -4.05069300 | 3.23963000  |                                                          |
| H                     | 0.68189000  | 0.13905400  | 2.84579900  |                                                          |
| H                     | 3.06219800  | 0.70049300  | 2.56004600  |                                                          |
| H                     | 3.55236100  | -1.04447600 | 2.87451900  |                                                          |
| <b>Name</b>           |             |             |             | <b>TBO-C7-NVP-C7-NVP-RAF-IP</b>                          |
| Cartesian Coordinates |             |             |             | Frequency and Energy                                     |
| O                     | 1.81375500  | -3.33301800 | 0.14557100  | Zero-point correction= 0.419093 (Hartree/Particle)       |
| N                     | 1.91106700  | -1.04454500 | 0.01463600  | Thermal correction to Energy= 0.441188                   |
| C                     | -0.38897600 | -0.51048300 | -0.09342900 | Thermal correction to Enthalpy= 0.442132                 |
| C                     | 1.01898600  | 0.09304600  | -0.22122600 | Thermal correction to Gibbs Free Energy= 0.366169        |
| C                     | -0.19052800 | -2.00895600 | -0.33883400 | Sum of electronic and zero-point Energies= -960.561447   |
| C                     | 1.26856900  | -2.24646200 | -0.02493200 | Sum of electronic and thermal Energies= -960.539352      |
| C                     | 3.22192800  | -0.90381400 | 0.44886200  | Sum of electronic and thermal Enthalpies= -960.538408    |
| C                     | 3.97365000  | 0.31683000  | 0.03314600  | Sum of electronic and thermal Free Energies= -960.614372 |
| H                     | -1.08681800 | -0.05248500 | -0.79279400 |                                                          |
| H                     | -0.75960900 | -0.35061300 | 0.92029300  |                                                          |
| H                     | 1.21235100  | 0.50864500  | -1.21431700 |                                                          |
| H                     | 1.20255200  | 0.86960700  | 0.52347800  |                                                          |
| H                     | -0.36359100 | -2.29433600 | -1.38121900 |                                                          |
| H                     | -0.81202800 | -2.64706800 | 0.29260400  |                                                          |
| H                     | 3.76324200  | -1.84257500 | 0.47719300  |                                                          |
| H                     | 4.92365200  | 0.34002200  | 0.57716100  |                                                          |
| H                     | 3.41421600  | 1.22271700  | 0.28852600  |                                                          |
| O                     | -1.09881500 | -1.03837300 | 3.31909400  |                                                          |
| N                     | 1.03320300  | -1.87525600 | 3.13817400  |                                                          |
| C                     | 0.61495100  | -4.18532600 | 3.24383700  |                                                          |
| C                     | 1.73875700  | -3.14540300 | 3.32900800  |                                                          |
| C                     | -0.63462500 | -3.41837400 | 3.68121200  |                                                          |
| C                     | -0.31326700 | -1.97853200 | 3.35434900  |                                                          |
| C                     | 1.67722000  | -0.66107100 | 2.93963500  |                                                          |
| C                     | 3.00954700  | -0.54796900 | 2.66551200  |                                                          |

|                       |             |             |             |                                                          |
|-----------------------|-------------|-------------|-------------|----------------------------------------------------------|
| H                     | 0.82343700  | -5.05589200 | 3.86366300  |                                                          |
| H                     | 0.50756400  | -4.51190300 | 2.20816900  |                                                          |
| H                     | 2.23171800  | -3.13868300 | 4.30685400  |                                                          |
| H                     | 2.48869200  | -3.27994200 | 2.55006700  |                                                          |
| H                     | -0.79693100 | -3.47553700 | 4.76295400  |                                                          |
| H                     | -1.55440500 | -3.72737000 | 3.18486600  |                                                          |
| H                     | 1.00802400  | 0.19037200  | 2.91681300  |                                                          |
| H                     | 3.43332800  | 0.44931900  | 2.64927000  |                                                          |
| H                     | 3.69519300  | -1.36247100 | 2.86726400  |                                                          |
| O                     | 4.20743600  | 0.25461400  | -1.37401500 |                                                          |
| C                     | 4.66841700  | 1.46781600  | -2.00937000 |                                                          |
| C                     | 5.09975500  | 1.01868800  | -3.39905100 |                                                          |
| H                     | 5.42309100  | 1.87673300  | -3.99295500 |                                                          |
| H                     | 5.92813400  | 0.30908400  | -3.33004400 |                                                          |
| H                     | 4.26677300  | 0.53366400  | -3.91447000 |                                                          |
| C                     | 3.52145500  | 2.47180100  | -2.11487800 |                                                          |
| H                     | 2.68842800  | 2.03623600  | -2.67260000 |                                                          |
| H                     | 3.16152500  | 2.78764200  | -1.13264400 |                                                          |
| H                     | 3.86012100  | 3.36558700  | -2.64543600 |                                                          |
| C                     | 5.85336200  | 2.06674700  | -1.25503600 |                                                          |
| H                     | 6.63230100  | 1.31380600  | -1.10568500 |                                                          |
| H                     | 6.27704800  | 2.88824700  | -1.83765600 |                                                          |
| H                     | 5.55784200  | 2.46578500  | -0.28165100 |                                                          |
| <b>Name</b>           |             |             |             | <b>TBO-C7-NVP-C7-NVP-RAF-TL</b>                          |
| Cartesian Coordinates |             |             |             | Frequency and Energy                                     |
| O                     | 1.81476800  | -3.32878500 | 0.28140000  | Zero-point correction= 0.419832 (Hartree/Particle)       |
| N                     | 1.91821200  | -1.05010000 | 0.03200900  | Thermal correction to Energy= 0.441970                   |
| C                     | -0.37721000 | -0.53198000 | -0.16138000 | Thermal correction to Enthalpy= 0.442914                 |
| C                     | 1.03374400  | 0.07082200  | -0.27382900 | Thermal correction to Gibbs Free Energy= 0.366611        |
| C                     | -0.16711500 | -2.03562000 | -0.35951900 | Sum of electronic and zero-point Energies= -960.549453   |
| C                     | 1.27994000  | -2.26330100 | 0.02854900  | Sum of electronic and thermal Energies= -960.527315      |
| C                     | 3.22514500  | -0.89868500 | 0.46718600  | Sum of electronic and thermal Enthalpies= -960.526371    |
| C                     | 3.96827200  | 0.32413100  | 0.03977200  | Sum of electronic and thermal Free Energies= -960.602674 |
| H                     | -1.06151400 | -0.09486300 | -0.88726500 |                                                          |
| H                     | -0.77112300 | -0.34915300 | 0.83988500  |                                                          |
| H                     | 1.25891300  | 0.45111200  | -1.27475000 |                                                          |
| H                     | 1.18998300  | 0.87754400  | 0.44594100  |                                                          |
| H                     | -0.29100300 | -2.34772400 | -1.40106000 |                                                          |
| H                     | -0.81858600 | -2.65773500 | 0.25594000  |                                                          |
| H                     | 3.76679500  | -1.83715100 | 0.49314200  |                                                          |
| H                     | 4.93510200  | 0.33656300  | 0.55603500  |                                                          |
| H                     | 3.42086000  | 1.22852600  | 0.33224600  |                                                          |
| O                     | -1.10124300 | -1.05011400 | 3.20001500  |                                                          |
| N                     | 1.04245600  | -1.87537600 | 3.14535800  |                                                          |
| C                     | 0.62624900  | -4.18301300 | 3.26853700  |                                                          |
| C                     | 1.74451400  | -3.13708500 | 3.37359600  |                                                          |
| C                     | -0.64008100 | -3.41628600 | 3.65689400  |                                                          |
| C                     | -0.32094100 | -1.97727500 | 3.30494600  |                                                          |
| C                     | 1.68124600  | -0.66053700 | 2.95429900  |                                                          |
| C                     | 3.01487400  | -0.53861200 | 2.68467300  |                                                          |
| H                     | 0.81849900  | -5.04746800 | 3.90234200  |                                                          |
| H                     | 0.56160700  | -4.51593900 | 2.23162200  |                                                          |
| H                     | 2.21411200  | -3.11684500 | 4.36359000  |                                                          |
| H                     | 2.50789900  | -3.28521700 | 2.61002000  |                                                          |

|                       |             |             |             |                                                           |
|-----------------------|-------------|-------------|-------------|-----------------------------------------------------------|
| H                     | -0.83237400 | -3.45269300 | 4.73434100  |                                                           |
| H                     | -1.54492000 | -3.74235300 | 3.14523700  |                                                           |
| H                     | 1.00113100  | 0.18215000  | 2.92744000  |                                                           |
| H                     | 3.43672600  | 0.45943500  | 2.68208700  |                                                           |
| H                     | 3.70320300  | -1.34812700 | 2.89552100  |                                                           |
| O                     | 4.14951500  | 0.28475500  | -1.36920900 |                                                           |
| C                     | 4.64282500  | 1.48054400  | -1.99767500 |                                                           |
| C                     | 4.99301600  | 1.03591200  | -3.41187000 |                                                           |
| H                     | 5.33205600  | 1.88476400  | -4.01033400 |                                                           |
| H                     | 5.78494100  | 0.28421800  | -3.38626600 |                                                           |
| H                     | 4.11665300  | 0.59612100  | -3.89309900 |                                                           |
| C                     | 3.54675600  | 2.54636300  | -2.04060000 |                                                           |
| H                     | 2.67108400  | 2.16413100  | -2.57040400 |                                                           |
| H                     | 3.24084300  | 2.86250600  | -1.04035600 |                                                           |
| H                     | 3.90639400  | 3.43340600  | -2.56840300 |                                                           |
| C                     | 5.88836500  | 2.00912200  | -1.28674400 |                                                           |
| H                     | 6.63022200  | 1.21383300  | -1.17570500 |                                                           |
| H                     | 6.33494000  | 2.81346700  | -1.87586900 |                                                           |
| H                     | 5.65594800  | 2.41316600  | -0.29831600 |                                                           |
| <b>Name</b>           |             |             |             | <b>CMO-C7-NVP-C7-NVP-RAF-IP</b>                           |
| Cartesian Coordinates |             |             |             | Frequency and Energy                                      |
| O                     | 1.88265800  | -3.26390200 | 0.11952200  | Zero-point correction= 0.472548 (Hartree/Particle)        |
| N                     | 1.86974100  | -0.97340500 | -0.01008600 | Thermal correction to Energy= 0.497812                    |
| C                     | -0.45495100 | -0.54915400 | -0.08553900 | Thermal correction to Enthalpy= 0.498756                  |
| C                     | 0.92134300  | 0.12209100  | -0.22385600 | Thermal correction to Gibbs Free Energy= 0.414608         |
| C                     | -0.18803300 | -2.03557600 | -0.33896500 | Sum of electronic and zero-point Energies= -1152.217043   |
| C                     | 1.28420500  | -2.20461900 | -0.04259000 | Sum of electronic and thermal Energies= -1152.191779      |
| C                     | 3.17902600  | -0.77333400 | 0.40279100  | Sum of electronic and thermal Enthalpies= -1152.190834    |
| C                     | 3.86827800  | 0.48046300  | -0.02083000 | Sum of electronic and thermal Free Energies= -1152.274983 |
| H                     | -1.18021900 | -0.12241300 | -0.77668600 |                                                           |
| H                     | -0.82395400 | -0.41182200 | 0.93202200  |                                                           |
| H                     | 1.08248500  | 0.55664100  | -1.21457700 |                                                           |
| H                     | 1.07715200  | 0.89878100  | 0.52731200  |                                                           |
| H                     | -0.35836200 | -2.32481400 | -1.38074500 |                                                           |
| H                     | -0.77186200 | -2.70468600 | 0.29611800  |                                                           |
| H                     | 3.76311200  | -1.68622900 | 0.42260600  |                                                           |
| H                     | 4.82438100  | 0.54444700  | 0.50766800  |                                                           |
| H                     | 3.27261000  | 1.36041000  | 0.24182200  |                                                           |
| O                     | -1.04561300 | -1.29379200 | 3.32142300  |                                                           |
| N                     | 1.15456800  | -1.92681800 | 3.13525600  |                                                           |
| C                     | 0.95549300  | -4.26714600 | 3.25580600  |                                                           |
| C                     | 1.97823900  | -3.12517300 | 3.31313200  |                                                           |
| C                     | -0.35690700 | -3.61643300 | 3.69830800  |                                                           |
| C                     | -0.17480600 | -2.15527700 | 3.35965500  |                                                           |
| C                     | 1.67944900  | -0.65916800 | 2.92373700  |                                                           |
| C                     | 2.98994000  | -0.42424300 | 2.62426800  |                                                           |
| H                     | 1.25182100  | -5.10491100 | 3.88496600  |                                                           |
| H                     | 0.86780500  | -4.61752700 | 2.22636800  |                                                           |
| H                     | 2.49197500  | -3.06798900 | 4.27845500  |                                                           |
| H                     | 2.71917000  | -3.19225700 | 2.51676600  |                                                           |
| H                     | -0.50584900 | -3.68053200 | 4.78152800  |                                                           |
| H                     | -1.24701100 | -4.01399900 | 3.21105500  |                                                           |
| H                     | 0.93432000  | 0.12691500  | 2.91298000  |                                                           |
| H                     | 3.31913000  | 0.60791200  | 2.59670600  |                                                           |

|                       |             |             |             |                                                           |
|-----------------------|-------------|-------------|-------------|-----------------------------------------------------------|
| H                     | 3.75280500  | -1.17081500 | 2.81095500  |                                                           |
| O                     | 4.08227300  | 0.42272300  | -1.43248100 |                                                           |
| C                     | 4.51208900  | 1.63114900  | -2.07693600 |                                                           |
| C                     | 3.33463800  | 2.60695200  | -2.17369100 |                                                           |
| H                     | 2.51424900  | 2.15077900  | -2.73269500 |                                                           |
| H                     | 2.97687100  | 2.88895100  | -1.18073500 |                                                           |
| H                     | 3.63642900  | 3.52273700  | -2.68580800 |                                                           |
| C                     | 5.68629000  | 2.26420800  | -1.32506100 |                                                           |
| H                     | 6.48866800  | 1.53419900  | -1.18877700 |                                                           |
| H                     | 6.08018800  | 3.10862700  | -1.89291500 |                                                           |
| H                     | 5.37334900  | 2.63790400  | -0.34735600 |                                                           |
| C                     | 4.96052500  | 1.22108500  | -3.47946200 |                                                           |
| C                     | 4.96393600  | -0.11062400 | -3.89542300 |                                                           |
| C                     | 5.38621800  | 2.20237100  | -4.38282400 |                                                           |
| C                     | 5.38259800  | -0.45302000 | -5.18135300 |                                                           |
| H                     | 4.63933500  | -0.88571800 | -3.21411000 |                                                           |
| C                     | 5.80405300  | 1.86143900  | -5.66404200 |                                                           |
| H                     | 5.39563000  | 3.24609600  | -4.08674200 |                                                           |
| C                     | 5.80397800  | 0.52842600  | -6.07039900 |                                                           |
| H                     | 5.37746600  | -1.49448300 | -5.48415400 |                                                           |
| H                     | 6.13070400  | 2.63859500  | -6.34626200 |                                                           |
| H                     | 6.12907900  | 0.26087700  | -7.06954100 |                                                           |
| <b>Name</b>           |             |             |             | <b>CMO-C7-NVP-C7-NVP-RAF-TL</b>                           |
| Cartesian Coordinates |             |             |             | Frequency and Energy                                      |
| O                     | 1.94554800  | -3.26880300 | 0.22865700  | Zero-point correction= 0.473376 (Hartree/Particle)        |
| N                     | 1.91410300  | -0.98442300 | 0.01330500  | Thermal correction to Energy= 0.498567                    |
| C                     | -0.40931300 | -0.59907600 | -0.14846600 | Thermal correction to Enthalpy= 0.499511                  |
| C                     | 0.96229200  | 0.08794600  | -0.26387100 | Thermal correction to Gibbs Free Energy= 0.415597         |
| C                     | -0.11295300 | -2.08315300 | -0.38005200 | Sum of electronic and zero-point Energies= -1152.205786   |
| C                     | 1.34719100  | -2.23303700 | -0.00378300 | Sum of electronic and thermal Energies= -1152.180595      |
| C                     | 3.21406200  | -0.76332100 | 0.43865800  | Sum of electronic and thermal Enthalpies= -1152.179651    |
| C                     | 3.88933200  | 0.49581500  | 0.00542400  | Sum of electronic and thermal Free Energies= -1152.263565 |
| H                     | -1.12690100 | -0.18856200 | -0.85747900 |                                                           |
| H                     | -0.80068700 | -0.46100900 | 0.86100600  |                                                           |
| H                     | 1.15276400  | 0.49829600  | -1.26021700 |                                                           |
| H                     | 1.07926800  | 0.88909100  | 0.46979900  |                                                           |
| H                     | -0.22297800 | -2.37811400 | -1.42818400 |                                                           |
| H                     | -0.72440800 | -2.75549000 | 0.22310500  |                                                           |
| H                     | 3.80567700  | -1.67131700 | 0.45987600  |                                                           |
| H                     | 4.85438500  | 0.56353900  | 0.51919800  |                                                           |
| H                     | 3.29370300  | 1.37142200  | 0.28930000  |                                                           |
| O                     | -1.04875800 | -1.26830700 | 3.21316600  |                                                           |
| N                     | 1.15554100  | -1.91064700 | 3.13041700  |                                                           |
| C                     | 0.93474800  | -4.24706500 | 3.23537200  |                                                           |
| C                     | 1.96342600  | -3.11179700 | 3.33287100  |                                                           |
| C                     | -0.38698300 | -3.59154100 | 3.64270900  |                                                           |
| C                     | -0.19312900 | -2.12794000 | 3.30187500  |                                                           |
| C                     | 1.68774300  | -0.64585100 | 2.94135700  |                                                           |
| C                     | 3.00333100  | -0.41107700 | 2.65917000  |                                                           |
| H                     | 1.20604000  | -5.09485500 | 3.86273900  |                                                           |
| H                     | 0.88521200  | -4.57986400 | 2.19775700  |                                                           |
| H                     | 2.44837700  | -3.06183800 | 4.31428300  |                                                           |
| H                     | 2.72251600  | -3.18830600 | 2.55437900  |                                                           |
| H                     | -0.56558000 | -3.65329600 | 4.72131700  |                                                           |

|                       |             |             |             |                                                           |
|-----------------------|-------------|-------------|-------------|-----------------------------------------------------------|
| H                     | -1.26614700 | -3.98759500 | 3.13574100  |                                                           |
| H                     | 0.93928700  | 0.13707100  | 2.92636500  |                                                           |
| H                     | 3.33925500  | 0.61909100  | 2.65351500  |                                                           |
| H                     | 3.76050100  | -1.15946800 | 2.85936700  |                                                           |
| O                     | 4.07203900  | 0.45084600  | -1.40456100 |                                                           |
| C                     | 4.51378600  | 1.64817900  | -2.05233400 |                                                           |
| C                     | 3.35545800  | 2.64999800  | -2.12500500 |                                                           |
| H                     | 2.51778400  | 2.21238800  | -2.67153900 |                                                           |
| H                     | 3.01909000  | 2.93822600  | -1.12609200 |                                                           |
| H                     | 3.66366000  | 3.56125400  | -2.64120800 |                                                           |
| C                     | 5.71654800  | 2.25708400  | -1.32445400 |                                                           |
| H                     | 6.50366600  | 1.50892500  | -1.20274500 |                                                           |
| H                     | 6.12305000  | 3.08896500  | -1.90140100 |                                                           |
| H                     | 5.43351100  | 2.64252900  | -0.34193800 |                                                           |
| C                     | 4.92433900  | 1.22938800  | -3.46378100 |                                                           |
| C                     | 4.88268200  | -0.10297100 | -3.87254600 |                                                           |
| C                     | 5.35654400  | 2.19558800  | -4.37804600 |                                                           |
| C                     | 5.26628100  | -0.45978200 | -5.16410200 |                                                           |
| H                     | 4.54887300  | -0.85936800 | -3.17542900 |                                                           |
| C                     | 5.73913000  | 1.83994000  | -5.66564300 |                                                           |
| H                     | 5.39880100  | 3.23981600  | -4.08658400 |                                                           |
| C                     | 5.69561300  | 0.50669800  | -6.06497100 |                                                           |
| H                     | 5.22759500  | -1.50127700 | -5.46303700 |                                                           |
| H                     | 6.07213000  | 2.60492600  | -6.35787000 |                                                           |
| H                     | 5.99365900  | 0.22703200  | -7.06880500 |                                                           |
| <b>Name</b>           |             |             |             | <b>IP-C2-(C7-NVP)<sub>3</sub>-RAF-IP</b>                  |
| Cartesian Coordinates |             |             |             | Frequency and Energy                                      |
| O                     | 2.67557200  | 1.19086200  | 1.17012100  | Zero-point correction= 0.541036 (Hartree/Particle)        |
| N                     | 4.87832000  | 0.80115400  | 0.65262000  | Thermal correction to Energy= 0.569564                    |
| C                     | 5.07980700  | -1.45453300 | 1.28371700  | Thermal correction to Enthalpy= 0.570508                  |
| C                     | 5.90150500  | -0.22317700 | 0.88149400  | Thermal correction to Gibbs Free Energy= 0.479549         |
| C                     | 3.81534300  | -0.85677700 | 1.90408900  | Sum of electronic and zero-point Energies= -1285.177158   |
| C                     | 3.67607500  | 0.47978300  | 1.21159700  | Sum of electronic and thermal Energies= -1285.148631      |
| C                     | 5.10563400  | 1.98136300  | -0.04909300 | Sum of electronic and thermal Enthalpies= -1285.147686    |
| C                     | 6.44557300  | 2.63493700  | 0.07338800  | Sum of electronic and thermal Free Energies= -1285.238645 |
| H                     | 4.81864000  | -2.02584800 | 0.39060300  |                                                           |
| H                     | 6.57546900  | 0.09400500  | 1.68333200  |                                                           |
| H                     | 6.48539100  | -0.37755000 | -0.02788800 |                                                           |
| H                     | 3.93883700  | -0.65746300 | 2.97428800  |                                                           |
| H                     | 2.91636000  | -1.45775600 | 1.76979900  |                                                           |
| H                     | 4.23454400  | 2.62721400  | -0.04813000 |                                                           |
| H                     | 6.48023900  | 3.48276800  | -0.61933400 |                                                           |
| H                     | 7.25083000  | 1.95202000  | -0.21690300 |                                                           |
| O                     | 4.94066200  | 2.30185600  | 3.57850500  |                                                           |
| N                     | 5.60927500  | 3.86950300  | 2.03928400  |                                                           |
| C                     | 4.05759500  | 5.57887800  | 2.43661600  |                                                           |
| C                     | 5.09923900  | 5.09239200  | 1.42045900  |                                                           |
| C                     | 3.58500200  | 4.28807800  | 3.10815000  |                                                           |
| C                     | 4.76918300  | 3.35469100  | 2.96325100  |                                                           |
| C                     | 6.74569900  | 3.12600800  | 1.51005900  |                                                           |
| C                     | 8.05207700  | 3.92053400  | 1.54209700  |                                                           |
| H                     | 3.25448100  | 6.13952100  | 1.96082300  |                                                           |
| H                     | 4.54265900  | 6.22299700  | 3.17319500  |                                                           |
| H                     | 4.64514700  | 4.86563600  | 0.44857300  |                                                           |

|                       |             |             |             |                                                           |
|-----------------------|-------------|-------------|-------------|-----------------------------------------------------------|
| H                     | 5.90304500  | 5.81356500  | 1.26591400  |                                                           |
| H                     | 2.74725600  | 3.82854400  | 2.57278500  |                                                           |
| H                     | 3.30365700  | 4.39465100  | 4.15549000  |                                                           |
| H                     | 6.83975800  | 2.24906100  | 2.15417300  |                                                           |
| H                     | 8.77675600  | 3.37593800  | 0.92731500  |                                                           |
| H                     | 7.90545300  | 4.89489500  | 1.06486900  |                                                           |
| O                     | 9.02772500  | 2.85297700  | 3.49846300  |                                                           |
| C                     | 8.70143000  | 4.12876500  | 2.92064500  |                                                           |
| C                     | 7.82289000  | 4.91260400  | 3.89356800  |                                                           |
| C                     | 10.03587000 | 4.83785000  | 2.72967600  |                                                           |
| H                     | 7.46893600  | 5.84103900  | 3.43677200  |                                                           |
| H                     | 6.95365100  | 4.32721000  | 4.20152800  |                                                           |
| H                     | 8.39986400  | 5.16247800  | 4.78800900  |                                                           |
| H                     | 9.88218300  | 5.82864600  | 2.29562700  |                                                           |
| H                     | 10.68269200 | 4.26219200  | 2.06239400  |                                                           |
| H                     | 10.54080700 | 4.95407500  | 3.69168500  |                                                           |
| H                     | 8.21551200  | 2.44004600  | 3.81574500  |                                                           |
| H                     | 5.62937900  | -2.10358400 | 1.96359100  |                                                           |
| O                     | 7.38417200  | 4.05164000  | -4.33870200 |                                                           |
| N                     | 7.07152600  | 2.06489500  | -3.23140100 |                                                           |
| C                     | 9.27802200  | 1.26940900  | -3.12314600 |                                                           |
| C                     | 7.81825100  | 0.84286500  | -2.92671000 |                                                           |
| C                     | 9.19271800  | 2.40688200  | -4.14246500 |                                                           |
| C                     | 7.80805600  | 2.97534300  | -3.93322600 |                                                           |
| C                     | 5.71099100  | 2.22178300  | -2.98535500 |                                                           |
| C                     | 4.97921500  | 1.36777800  | -2.21902800 |                                                           |
| H                     | 9.90128100  | 0.43989400  | -3.45277500 |                                                           |
| H                     | 9.67470400  | 1.64843400  | -2.17899600 |                                                           |
| H                     | 7.51457500  | 0.04984300  | -3.61815900 |                                                           |
| H                     | 7.61222700  | 0.51330900  | -1.90762900 |                                                           |
| H                     | 9.24034500  | 2.03881100  | -5.17296100 |                                                           |
| H                     | 9.94883500  | 3.18223700  | -4.02339000 |                                                           |
| H                     | 5.29885400  | 3.14186900  | -3.38085800 |                                                           |
| H                     | 3.90413700  | 1.49438300  | -2.19790800 |                                                           |
| H                     | 5.35570000  | 0.38446200  | -1.95807400 |                                                           |
| <b>Name</b>           |             |             |             | <b>TL-C7-(C7-NVP)<sub>3</sub>-RAF-TL</b>                  |
| Cartesian Coordinates |             |             |             | Frequency and Energy                                      |
| O                     | 1.25422500  | -2.56817200 | -0.77159500 | Zero-point correction= 0.562096 (Hartree/Particle)        |
| N                     | 1.41863000  | -0.33564200 | -0.25968700 | Thermal correction to Energy= 0.591765                    |
| C                     | -0.79095200 | 0.36027200  | -0.62978400 | Thermal correction to Enthalpy= 0.592709                  |
| C                     | 0.63052700  | 0.88431700  | -0.36544200 | Thermal correction to Gibbs Free Energy= 0.495830         |
| C                     | -0.56239200 | -1.00419100 | -1.28408100 | Sum of electronic and zero-point Energies= -1362.321039   |
| C                     | 0.79225000  | -1.43949900 | -0.75093300 | Sum of electronic and thermal Energies= -1362.291371      |
| C                     | 2.71816100  | -0.38740700 | 0.38644600  | Sum of electronic and thermal Enthalpies= -1362.290427    |
| C                     | 3.71022300  | 0.57764600  | -0.26073400 | Sum of electronic and thermal Free Energies= -1362.387306 |
| H                     | -1.37439700 | 1.04642100  | -1.24238800 |                                                           |
| H                     | -1.30067600 | 0.21270600  | 0.32403900  |                                                           |
| H                     | 0.99963700  | 1.51238000  | -1.18590800 |                                                           |
| H                     | 0.69468300  | 1.46394000  | 0.55974300  |                                                           |
| H                     | -0.48787700 | -0.93993400 | -2.37428200 |                                                           |
| H                     | -1.31696900 | -1.74886700 | -1.03486500 |                                                           |
| H                     | 3.06023300  | -1.41420000 | 0.23324300  |                                                           |
| H                     | 4.65871600  | 0.51864100  | 0.28347900  |                                                           |
| H                     | 3.34931600  | 1.60687200  | -0.14453400 |                                                           |

|                       |             |             |             |                                                    |
|-----------------------|-------------|-------------|-------------|----------------------------------------------------|
| C                     | 7.21111000  | 1.89255800  | -2.88001200 |                                                    |
| C                     | 6.30000400  | 0.97414700  | -2.36717000 |                                                    |
| C                     | 4.93230900  | 1.25434600  | -2.35159500 |                                                    |
| C                     | 4.49826400  | 2.47963100  | -2.86228300 |                                                    |
| C                     | 5.40491000  | 3.40164300  | -3.37548000 |                                                    |
| C                     | 6.76595900  | 3.11033900  | -3.38541500 |                                                    |
| H                     | 8.26897800  | 1.65535300  | -2.88894300 |                                                    |
| H                     | 6.65213700  | 0.02358500  | -1.97806400 |                                                    |
| H                     | 3.43663800  | 2.70927200  | -2.86293700 |                                                    |
| H                     | 5.04890300  | 4.34573700  | -3.77218100 |                                                    |
| H                     | 7.47390900  | 3.82511100  | -3.78851300 |                                                    |
| C                     | 3.95058200  | 0.28300100  | -1.74589000 |                                                    |
| H                     | 4.32169900  | -0.74048600 | -1.85491200 |                                                    |
| H                     | 2.99868900  | 0.33543100  | -2.28294000 |                                                    |
| O                     | -1.21577200 | -1.79032400 | 2.11064200  |                                                    |
| N                     | 1.05877700  | -2.04402000 | 2.33112600  |                                                    |
| C                     | 1.26971400  | -4.36532300 | 2.03517400  |                                                    |
| C                     | 2.03062800  | -3.11887300 | 2.50884700  |                                                    |
| C                     | -0.19976100 | -4.01854000 | 2.29020200  |                                                    |
| C                     | -0.23342300 | -2.50774800 | 2.22940400  |                                                    |
| C                     | 1.34593200  | -0.70600600 | 2.49252700  |                                                    |
| C                     | 2.59728500  | -0.12900700 | 1.91408400  |                                                    |
| H                     | 1.59792400  | -5.26241700 | 2.55831300  |                                                    |
| H                     | 1.43500800  | -4.49227600 | 0.96524000  |                                                    |
| H                     | 2.31303100  | -3.17934900 | 3.56742700  |                                                    |
| H                     | 2.92729600  | -2.92933400 | 1.91704700  |                                                    |
| H                     | -0.53592800 | -4.31021600 | 3.29059100  |                                                    |
| H                     | -0.89181300 | -4.44049000 | 1.56195700  |                                                    |
| H                     | 0.45007900  | -0.10135000 | 2.49217600  |                                                    |
| H                     | 2.60057000  | 0.94706600  | 2.11323400  |                                                    |
| H                     | 3.49654100  | -0.53781000 | 2.38942400  |                                                    |
| O                     | -1.59314900 | -3.07949500 | 5.39690000  |                                                    |
| N                     | -0.97712000 | -0.88330000 | 5.13216300  |                                                    |
| C                     | -3.07063800 | 0.15656200  | 5.00480500  |                                                    |
| C                     | -1.57893700 | 0.37479500  | 4.71392600  |                                                    |
| C                     | -3.24734900 | -1.35548400 | 4.84922700  |                                                    |
| C                     | -1.88178800 | -1.92120600 | 5.17313200  |                                                    |
| C                     | 0.38853500  | -1.11024100 | 5.18410600  |                                                    |
| C                     | 1.33347700  | -0.26104600 | 4.71865900  |                                                    |
| H                     | -3.70302600 | 0.73402700  | 4.33216200  |                                                    |
| H                     | -3.29114600 | 0.45789700  | 6.03075100  |                                                    |
| H                     | -1.39947500 | 0.53392800  | 3.64526300  |                                                    |
| H                     | -1.14911500 | 1.20392800  | 5.27988700  |                                                    |
| H                     | -3.45374900 | -1.63423000 | 3.81164200  |                                                    |
| H                     | -4.01282900 | -1.79608000 | 5.48679100  |                                                    |
| H                     | 0.64114400  | -2.10025100 | 5.54487400  |                                                    |
| H                     | 2.37190800  | -0.53126800 | 4.86430200  |                                                    |
| H                     | 1.12152500  | 0.75846900  | 4.41549900  |                                                    |
| <b>Name</b>           |             |             |             | <b>CMO-(C7-NVP)<sub>3</sub>-RAF-IP</b>             |
| Cartesian Coordinates |             |             |             | Frequency and Energy                               |
| O                     | 1.11190400  | -1.63390400 | -0.49661000 | Zero-point correction= 0.621923 (Hartree/Particle) |
| N                     | 1.88549900  | 0.42398800  | 0.16871000  | Thermal correction to Energy= 0.654287             |
| C                     | -0.05104600 | 1.72497100  | -0.06086000 | Thermal correction to Enthalpy= 0.655231           |
| C                     | 1.46598200  | 1.82361400  | 0.15174000  | Thermal correction to Gibbs Free Energy= 0.554403  |

|   |             |             |             |                                              |              |
|---|-------------|-------------|-------------|----------------------------------------------|--------------|
| C | -0.22418400 | 0.39774000  | -0.80339200 | Sum of electronic and zero-point Energies=   | -1516.098115 |
| C | 0.97753300  | -0.41765600 | -0.36668600 | Sum of electronic and thermal Energies=      | -1516.065750 |
| C | 3.16113600  | -0.00606800 | 0.71239900  | Sum of electronic and thermal Enthalpies=    | -1516.064806 |
| C | 4.31990300  | 0.68754500  | 0.01337800  | Sum of electronic and thermal Free Energies= | -1516.165634 |
| H | -0.44470000 | 2.58193500  | -0.60553100 |                                              |              |
| H | -0.54889600 | 1.66925300  | 0.90975300  |                                              |              |
| H | 1.96209600  | 2.35527000  | -0.66762200 |                                              |              |
| H | 1.73089100  | 2.31291600  | 1.09210800  |                                              |              |
| H | -0.16184400 | 0.51988900  | -1.88969400 |                                              |              |
| H | -1.14690800 | -0.13311800 | -0.57037000 |                                              |              |
| H | 3.22333800  | -1.07746800 | 0.51080500  |                                              |              |
| H | 5.25503800  | 0.37130500  | 0.48947100  |                                              |              |
| H | 4.22794100  | 1.77359700  | 0.13203500  |                                              |              |
| O | -0.80118300 | -0.78564200 | 2.93620700  |                                              |              |
| N | 1.41953000  | -1.36426700 | 2.80790000  |                                              |              |
| C | 1.26644400  | -3.70046900 | 2.61941400  |                                              |              |
| C | 2.24484100  | -2.56668200 | 2.94739500  |                                              |              |
| C | -0.09572600 | -3.13527500 | 3.02906800  |                                              |              |
| C | 0.08473600  | -1.63764700 | 2.92244900  |                                              |              |
| C | 1.92604100  | -0.07836700 | 2.90769000  |                                              |              |
| C | 3.23057000  | 0.23029200  | 2.24170500  |                                              |              |
| H | 1.52560700  | -4.62044700 | 3.14113300  |                                              |              |
| H | 1.28198600  | -3.89187300 | 1.54510000  |                                              |              |
| H | 2.61866700  | -2.62548900 | 3.97650500  |                                              |              |
| H | 3.09585100  | -2.53528300 | 2.26688700  |                                              |              |
| H | -0.34136100 | -3.36267900 | 4.07153200  |                                              |              |
| H | -0.92685000 | -3.46352300 | 2.40447100  |                                              |              |
| H | 1.14627500  | 0.67196500  | 2.84259900  |                                              |              |
| H | 3.48153200  | 1.27533900  | 2.44819300  |                                              |              |
| H | 4.04507000  | -0.38181400 | 2.64092000  |                                              |              |
| O | 4.29035400  | 0.30785900  | -1.34825300 |                                              |              |
| C | 5.08685000  | 1.07012200  | -2.26374700 |                                              |              |
| C | 4.44401700  | 2.44303900  | -2.48527900 |                                              |              |
| H | 3.42298700  | 2.32177000  | -2.85536800 |                                              |              |
| H | 4.42269700  | 3.02141100  | -1.55875900 |                                              |              |
| H | 5.01385200  | 3.01597000  | -3.21941000 |                                              |              |
| C | 6.52010200  | 1.21308000  | -1.74515300 |                                              |              |
| H | 6.94320800  | 0.22986200  | -1.52283200 |                                              |              |
| H | 7.14488600  | 1.69696200  | -2.49751100 |                                              |              |
| H | 6.54989700  | 1.82722400  | -0.84202200 |                                              |              |
| C | 5.08227200  | 0.28446800  | -3.57417700 |                                              |              |
| C | 4.41257100  | -0.93267200 | -3.70438100 |                                              |              |
| C | 5.76305700  | 0.79400300  | -4.68604800 |                                              |              |
| C | 4.42650300  | -1.62482300 | -4.91547800 |                                              |              |
| H | 3.87673200  | -1.34352000 | -2.85876400 |                                              |              |
| C | 5.77748100  | 0.10408100  | -5.89268800 |                                              |              |
| H | 6.28970100  | 1.73990900  | -4.61342800 |                                              |              |
| C | 5.10789700  | -1.11226700 | -6.01289100 |                                              |              |
| H | 3.89969500  | -2.56949800 | -4.99577500 |                                              |              |
| H | 6.31254600  | 0.51725300  | -6.74068000 |                                              |              |
| H | 5.11834500  | -1.65194800 | -6.95318000 |                                              |              |
| O | -0.99448000 | -2.02144500 | 6.28474300  |                                              |              |
| N | 0.03113500  | -0.00080000 | 5.91758000  |                                              |              |
| C | -1.77536100 | 1.47476800  | 6.16551800  |                                              |              |
| C | -0.34416400 | 1.38207600  | 5.62292700  |                                              |              |



|                       |             |             |             |                                                           |
|-----------------------|-------------|-------------|-------------|-----------------------------------------------------------|
| C                     | -2.29954800 | 0.04139900  | 6.05487900  |                                                           |
| C                     | -1.05179900 | -0.80893000 | 6.11671600  |                                                           |
| C                     | 1.31722800  | -0.49783900 | 5.73831500  |                                                           |
| C                     | 2.31139000  | 0.20751800  | 5.13520500  |                                                           |
| H                     | -2.37263700 | 2.19507600  | 5.60897100  |                                                           |
| H                     | -1.74828500 | 1.78090300  | 7.21288500  |                                                           |
| H                     | -0.30094500 | 1.54912200  | 4.54139400  |                                                           |
| H                     | 0.34363400  | 2.07093000  | 6.11535300  |                                                           |
| H                     | -2.76868000 | -0.15081800 | 5.08429000  |                                                           |
| H                     | -3.00222300 | -0.24776700 | 6.83615000  |                                                           |
| H                     | 1.42956500  | -1.53907200 | 6.01508600  |                                                           |
| H                     | 3.30655600  | -0.22080300 | 5.11668300  |                                                           |
| H                     | 2.23858500  | 1.27956600  | 4.99191700  |                                                           |
| <b>Name</b>           |             |             |             | <b>CMO-(C7-NVP)<sub>3</sub>-RAF-TL</b>                    |
| Cartesian Coordinates |             |             |             | Frequency and Energy                                      |
| O                     | 1.11408800  | -1.63936900 | -0.49409000 | Zero-point correction= 0.622221 (Hartree/Particle)        |
| N                     | 1.87877600  | 0.42415000  | 0.16397600  | Thermal correction to Energy= 0.654715                    |
| C                     | -0.06313300 | 1.71604000  | -0.07054600 | Thermal correction to Enthalpy= 0.655659                  |
| C                     | 1.45344900  | 1.82192200  | 0.14172500  | Thermal correction to Gibbs Free Energy= 0.553935         |
| C                     | -0.23058500 | 0.38546700  | -0.80836400 | Sum of electronic and zero-point Energies= -1516.078384   |
| C                     | 0.97445600  | -0.42326100 | -0.36850800 | Sum of electronic and thermal Energies= -1516.045890      |
| C                     | 3.15619800  | 0.00134800  | 0.70903100  | Sum of electronic and thermal Enthalpies= -1516.044945    |
| C                     | 4.31218200  | 0.69963000  | 0.01009600  | Sum of electronic and thermal Free Energies= -1516.146669 |
| H                     | -0.46051000 | 2.56938500  | -0.61817800 |                                                           |
| H                     | -0.56068900 | 1.66153500  | 0.90030000  |                                                           |
| H                     | 1.94749400  | 2.35254300  | -0.67964600 |                                                           |
| H                     | 1.71622800  | 2.31591500  | 1.08024300  |                                                           |
| H                     | -0.16847800 | 0.50400500  | -1.89507800 |                                                           |
| H                     | -1.15113700 | -0.14839000 | -0.57363000 |                                                           |
| H                     | 3.22378900  | -1.07004100 | 0.50916000  |                                                           |
| H                     | 5.24794800  | 0.38737800  | 0.48740800  |                                                           |
| H                     | 4.21506200  | 1.78539300  | 0.12808800  |                                                           |
| O                     | -0.80215800 | -0.79351500 | 2.94266800  |                                                           |
| N                     | 1.42116900  | -1.36106000 | 2.80964500  |                                                           |
| C                     | 1.27954400  | -3.69851500 | 2.62830700  |                                                           |
| C                     | 2.25302100  | -2.55883400 | 2.95039700  |                                                           |
| C                     | -0.08426200 | -3.13920100 | 3.04051200  |                                                           |
| C                     | 0.08812400  | -1.64098400 | 2.92886000  |                                                           |
| C                     | 1.92129800  | -0.07238300 | 2.90499800  |                                                           |
| C                     | 3.22412000  | 0.24081100  | 2.23792900  |                                                           |
| H                     | 1.54497100  | -4.61578300 | 3.15164100  |                                                           |
| H                     | 1.29287800  | -3.89261900 | 1.55443900  |                                                           |
| H                     | 2.62987000  | -2.61277400 | 3.97867900  |                                                           |
| H                     | 3.10202600  | -2.52506100 | 2.26751100  |                                                           |
| H                     | -0.32541700 | -3.36472000 | 4.08443300  |                                                           |
| H                     | -0.91562200 | -3.47368100 | 2.41954400  |                                                           |
| H                     | 1.13791600  | 0.67404500  | 2.83839300  |                                                           |
| H                     | 3.47020600  | 1.28743900  | 2.44229900  |                                                           |
| H                     | 4.04150400  | -0.36663500 | 2.63836500  |                                                           |
| O                     | 4.28473800  | 0.31926100  | -1.35125900 |                                                           |
| C                     | 5.09682700  | 1.06914400  | -2.26334600 |                                                           |
| C                     | 4.47959500  | 2.45377600  | -2.48440600 |                                                           |
| H                     | 3.45680200  | 2.35197400  | -2.85544900 |                                                           |
| H                     | 4.46889600  | 3.03179600  | -1.55751800 |                                                           |

|                       |             |             |             |                                                           |
|-----------------------|-------------|-------------|-------------|-----------------------------------------------------------|
| H                     | 5.06063600  | 3.01656000  | -3.21759400 |                                                           |
| C                     | 6.53103900  | 1.18616000  | -1.74082300 |                                                           |
| H                     | 6.93557500  | 0.19547000  | -1.51706600 |                                                           |
| H                     | 7.16661300  | 1.65838700  | -2.49154600 |                                                           |
| H                     | 6.56954400  | 1.79998100  | -0.83781000 |                                                           |
| C                     | 5.08191000  | 0.28520300  | -3.57476400 |                                                           |
| C                     | 4.39186400  | -0.92021900 | -3.70800300 |                                                           |
| C                     | 5.77443200  | 0.78388300  | -4.68427900 |                                                           |
| C                     | 4.39718200  | -1.61137000 | -4.91973100 |                                                           |
| H                     | 3.84705800  | -1.32281600 | -2.86417400 |                                                           |
| C                     | 5.78047200  | 0.09485800  | -5.89149800 |                                                           |
| H                     | 6.31696300  | 1.72057200  | -4.60951000 |                                                           |
| C                     | 5.09042100  | -1.10969300 | -6.01475400 |                                                           |
| H                     | 3.85455100  | -2.54685000 | -5.00226400 |                                                           |
| H                     | 6.32510500  | 0.49944100  | -6.73753900 |                                                           |
| H                     | 5.09427000  | -1.64865700 | -6.95550400 |                                                           |
| O                     | -0.98165000 | -2.02260500 | 6.29539300  |                                                           |
| N                     | 0.03141600  | 0.00270400  | 5.91931600  |                                                           |
| C                     | -1.78300800 | 1.46864000  | 6.16652700  |                                                           |
| C                     | -0.35245100 | 1.38242900  | 5.62113100  |                                                           |
| C                     | -2.29914900 | 0.03189600  | 6.06184100  |                                                           |
| C                     | -1.04636600 | -0.81098800 | 6.12357100  |                                                           |
| C                     | 1.31984700  | -0.48756100 | 5.73825100  |                                                           |
| C                     | 2.30855100  | 0.22175000  | 5.13075800  |                                                           |
| H                     | -2.38565500 | 2.18358800  | 5.60886400  |                                                           |
| H                     | -1.75545500 | 1.77846400  | 7.21279500  |                                                           |
| H                     | -0.31247600 | 1.54626600  | 4.53899200  |                                                           |
| H                     | 0.33242100  | 2.07677800  | 6.10989900  |                                                           |
| H                     | -2.76939600 | -0.16625000 | 5.09298900  |                                                           |
| H                     | -2.99833600 | -0.25871400 | 6.84570200  |                                                           |
| H                     | 1.43877900  | -1.52733800 | 6.01772700  |                                                           |
| H                     | 3.30608300  | -0.20096900 | 5.11129500  |                                                           |
| H                     | 2.22935900  | 1.29298600  | 4.98476700  |                                                           |
| <b>Name</b>           |             |             |             | <b>TBO-(C7-NVP)<sub>3</sub>-RAF-IP</b>                    |
| Cartesian Coordinates |             |             |             | Frequency and Energy                                      |
| O                     | 0.99956500  | -2.23709200 | 0.19305900  | Zero-point correction= 0.568119 (Hartree/Particle)        |
| N                     | 1.50184000  | -0.03452100 | 0.61121500  | Thermal correction to Energy= 0.598324                    |
| C                     | -0.53890100 | 0.99422600  | 0.08581500  | Thermal correction to Enthalpy= 0.599268                  |
| C                     | 0.93790900  | 1.29351300  | 0.37876200  | Thermal correction to Gibbs Free Energy= 0.503449         |
| C                     | -0.51223200 | -0.42868900 | -0.47742900 | Sum of electronic and zero-point Energies= -1324.442491   |
| C                     | 0.73050000  | -1.03737200 | 0.14323800  | Sum of electronic and thermal Energies= -1324.412287      |
| C                     | 2.76690100  | -0.23900200 | 1.29441400  | Sum of electronic and thermal Enthalpies= -1324.411342    |
| C                     | 3.89583000  | 0.50273200  | 0.59597600  | Sum of electronic and thermal Free Energies= -1324.507161 |
| H                     | -0.97697100 | 1.72265900  | -0.59501300 |                                                           |
| H                     | -1.10276200 | 1.00722000  | 1.02126500  |                                                           |
| H                     | 1.43681400  | 1.77114200  | -0.47154600 |                                                           |
| H                     | 1.07454200  | 1.92557800  | 1.25955000  |                                                           |
| H                     | -0.37750300 | -0.44129800 | -1.56395200 |                                                           |
| H                     | -1.38944000 | -1.02755200 | -0.23376800 |                                                           |
| H                     | 2.96413100  | -1.31160000 | 1.23806900  |                                                           |
| H                     | 4.81250700  | 0.37529400  | 1.18410300  |                                                           |
| H                     | 3.66378900  | 1.57420100  | 0.55865600  |                                                           |
| O                     | -1.26894900 | -1.19133600 | 3.29127100  |                                                           |
| N                     | 1.00243900  | -1.51873900 | 3.41882600  |                                                           |

|                       |             |             |             |                                                         |
|-----------------------|-------------|-------------|-------------|---------------------------------------------------------|
| C                     | 1.11603600  | -3.86355500 | 3.51451000  |                                                         |
| C                     | 1.93410000  | -2.59276000 | 3.77207100  |                                                         |
| C                     | -0.33138300 | -3.41647600 | 3.73359500  |                                                         |
| C                     | -0.30037900 | -1.93015700 | 3.45698900  |                                                         |
| C                     | 1.36322800  | -0.18122900 | 3.38913600  |                                                         |
| C                     | 2.68064400  | 0.18774600  | 2.78192800  |                                                         |
| H                     | 1.41888700  | -4.67809300 | 4.17062500  |                                                         |
| H                     | 1.25532300  | -4.17933300 | 2.47925200  |                                                         |
| H                     | 2.21695200  | -2.48713600 | 4.82613600  |                                                         |
| H                     | 2.83544600  | -2.54206700 | 3.16093300  |                                                         |
| H                     | -0.65369600 | -3.55064700 | 4.77110500  |                                                         |
| H                     | -1.05788500 | -3.90769500 | 3.08580400  |                                                         |
| H                     | 0.51961900  | 0.46470200  | 3.17428400  |                                                         |
| H                     | 2.80652300  | 1.27141900  | 2.86803900  |                                                         |
| H                     | 3.51666600  | -0.27615700 | 3.31417700  |                                                         |
| O                     | 4.04508900  | -0.04007200 | -0.70000000 |                                                         |
| C                     | 4.83791700  | 0.71442100  | -1.64050100 |                                                         |
| C                     | 5.02594200  | -0.23662200 | -2.81460500 |                                                         |
| H                     | 5.58283200  | 0.25369000  | -3.61621400 |                                                         |
| H                     | 5.57708400  | -1.12614600 | -2.49918500 |                                                         |
| H                     | 4.05450400  | -0.54918400 | -3.20629600 |                                                         |
| C                     | 4.07383700  | 1.95891900  | -2.08967000 |                                                         |
| H                     | 3.10500200  | 1.67461500  | -2.50896600 |                                                         |
| H                     | 3.91149000  | 2.65865400  | -1.26641000 |                                                         |
| H                     | 4.64270600  | 2.48334000  | -2.86177800 |                                                         |
| C                     | 6.18982800  | 1.08917400  | -1.03790000 |                                                         |
| H                     | 6.69207400  | 0.20150300  | -0.64328900 |                                                         |
| H                     | 6.82460300  | 1.52837200  | -1.81115300 |                                                         |
| H                     | 6.08687200  | 1.82247100  | -0.23421800 |                                                         |
| O                     | -1.64167100 | -2.01193800 | 6.73818200  |                                                         |
| N                     | -0.78664500 | 0.05196300  | 6.20866100  |                                                         |
| C                     | -2.74289100 | 1.34469200  | 6.13657300  |                                                         |
| C                     | -1.26588200 | 1.34638600  | 5.72380900  |                                                         |
| C                     | -3.11316500 | -0.13979200 | 6.15523200  |                                                         |
| C                     | -1.79999300 | -0.83952000 | 6.41898000  |                                                         |
| C                     | 0.55234700  | -0.32275800 | 6.19316100  |                                                         |
| C                     | 1.52464000  | 0.40784700  | 5.58467600  |                                                         |
| H                     | -3.35422900 | 1.93185500  | 5.45333400  |                                                         |
| H                     | -2.84096300 | 1.76475800  | 7.13926300  |                                                         |
| H                     | -1.14055800 | 1.39967200  | 4.63707200  |                                                         |
| H                     | -0.69594600 | 2.15419000  | 6.18508000  |                                                         |
| H                     | -3.46852000 | -0.48661200 | 5.17917900  |                                                         |
| H                     | -3.85438800 | -0.41489000 | 6.90530800  |                                                         |
| H                     | 0.73849200  | -1.30743000 | 6.60432800  |                                                         |
| H                     | 2.55344700  | 0.08626000  | 5.69572700  |                                                         |
| H                     | 1.36432400  | 1.44215600  | 5.30242700  |                                                         |
| <b>Name</b>           |             |             |             | <b>TBO-(C7-NVP)<sub>3</sub>-RAF-TL</b>                  |
| Cartesian Coordinates |             |             |             | Frequency and Energy                                    |
| O                     | 1.12148000  | -2.37595900 | 0.42105300  | Zero-point correction= 0.569558 (Hartree/Particle)      |
| N                     | 1.55416700  | -0.12959500 | 0.61386400  | Thermal correction to Energy= 0.599538                  |
| C                     | -0.52824600 | 0.76582300  | 0.03517000  | Thermal correction to Enthalpy= 0.600482                |
| C                     | 0.94112900  | 1.14619200  | 0.27570300  | Thermal correction to Gibbs Free Energy= 0.505675       |
| C                     | -0.44992000 | -0.69292000 | -0.42179900 | Sum of electronic and zero-point Energies= -1324.423417 |
| C                     | 0.81408400  | -1.20914200 | 0.24669400  | Sum of electronic and thermal Energies= -1324.393437    |

|   |             |             |             |                                              |              |
|---|-------------|-------------|-------------|----------------------------------------------|--------------|
| C | 2.82691100  | -0.24656600 | 1.29286500  | Sum of electronic and thermal Enthalpies=    | -1324.392493 |
| C | 3.91262300  | 0.54905700  | 0.58246800  | Sum of electronic and thermal Free Energies= | -1324.487299 |
| H | -1.01295700 | 1.42556100  | -0.68342100 |                                              |              |
| H | -1.07030100 | 0.81468600  | 0.98230400  |                                              |              |
| H | 1.41033500  | 1.57165700  | -0.61961700 |                                              |              |
| H | 1.05895200  | 1.85998100  | 1.09643800  |                                              |              |
| H | -0.31390500 | -0.78280900 | -1.50418100 |                                              |              |
| H | -1.30573900 | -1.30099100 | -0.13200900 |                                              |              |
| H | 3.08252800  | -1.30638600 | 1.23869000  |                                              |              |
| H | 4.83590800  | 0.47661400  | 1.17243600  |                                              |              |
| H | 3.62412300  | 1.60901600  | 0.54652500  |                                              |              |
| O | -1.32201500 | -0.78948000 | 3.34165300  |                                              |              |
| N | 0.90050500  | -1.36455200 | 3.39393000  |                                              |              |
| C | 0.76215900  | -3.71266500 | 3.39939800  |                                              |              |
| C | 1.72247000  | -2.54217900 | 3.65751800  |                                              |              |
| C | -0.62703900 | -3.12188500 | 3.65742100  |                                              |              |
| C | -0.44483000 | -1.63496100 | 3.44378400  |                                              |              |
| C | 1.38860400  | -0.06865100 | 3.38780000  |                                              |              |
| C | 2.73544300  | 0.19084500  | 2.78283000  |                                              |              |
| H | 0.98861600  | -4.56657700 | 4.03628700  |                                              |              |
| H | 0.85003100  | -4.01088200 | 2.35507900  |                                              |              |
| H | 2.07703300  | -2.51111400 | 4.69521400  |                                              |              |
| H | 2.58393400  | -2.56687100 | 2.98911800  |                                              |              |
| H | -0.95891100 | -3.26201500 | 4.69096900  |                                              |              |
| H | -1.40355600 | -3.50266500 | 2.99385400  |                                              |              |
| H | 0.60258600  | 0.64361500  | 3.16162300  |                                              |              |
| H | 2.93993000  | 1.26355100  | 2.87040100  |                                              |              |
| H | 3.52877900  | -0.32440100 | 3.33458900  |                                              |              |
| O | 4.08485700  | 0.01458500  | -0.70577500 |                                              |              |
| C | 4.88723500  | 0.76600100  | -1.63084800 |                                              |              |
| C | 5.09630700  | -0.18967500 | -2.79807600 |                                              |              |
| H | 5.65873100  | 0.29664900  | -3.59835500 |                                              |              |
| H | 5.64574700  | -1.07402800 | -2.46824500 |                                              |              |
| H | 4.13104800  | -0.51308600 | -3.19367900 |                                              |              |
| C | 4.12764200  | 2.00768600  | -2.09945800 |                                              |              |
| H | 3.17243500  | 1.71650500  | -2.54289800 |                                              |              |
| H | 3.93790500  | 2.70612900  | -1.28071600 |                                              |              |
| H | 4.70958500  | 2.54012700  | -2.85596500 |                                              |              |
| C | 6.23159900  | 1.14998300  | -1.01346700 |                                              |              |
| H | 6.72590600  | 0.26763000  | -0.59840100 |                                              |              |
| H | 6.88110300  | 1.57647000  | -1.78130400 |                                              |              |
| H | 6.12098500  | 1.89581300  | -0.22227000 |                                              |              |
| O | -1.38278300 | -2.07637500 | 6.84501100  |                                              |              |
| N | -0.68053400 | 0.03440300  | 6.27409200  |                                              |              |
| C | -2.72499300 | 1.18145200  | 6.21022000  |                                              |              |
| C | -1.25415600 | 1.28159900  | 5.78126900  |                                              |              |
| C | -2.99080600 | -0.32484300 | 6.24960900  |                                              |              |
| C | -1.63030600 | -0.93238000 | 6.51676200  |                                              |              |
| C | 0.67268100  | -0.26066300 | 6.22304700  |                                              |              |
| C | 1.58901200  | 0.51063100  | 5.57187200  |                                              |              |
| H | -3.38201200 | 1.71547000  | 5.52545700  |                                              |              |
| H | -2.84518600 | 1.60846600  | 7.20787900  |                                              |              |
| H | -1.15140200 | 1.32074000  | 4.69232500  |                                              |              |
| H | -0.73974200 | 2.13449700  | 6.22843700  |                                              |              |
| H | -3.31158600 | -0.70472900 | 5.27485500  |                                              |              |

|   |             |             |            |  |
|---|-------------|-------------|------------|--|
| H | -3.71164600 | -0.64253900 | 7.00199700 |  |
| H | 0.91696400  | -1.23175900 | 6.63541300 |  |
| H | 2.63612200  | 0.25011700  | 5.66924900 |  |
| H | 1.37264800  | 1.53969400  | 5.30921700 |  |
